# Supplementary material for: In vitro Symbiosis of Reef-Building Coral Cells With Photosynthetic Dinoflagellates
Source: Frontiers journal article supplement (doi:10.3389/fmars.2021.706308), 2021-07-14
Supplement: Table_1.XLSX [file Table_1.XLSX]

## Sheet: Table_s1_reannotated
Supplementary Table S1. Acropora tenuis genes expressed in IVB5 cell line.
GeneID	blast result	Length	At_P_Mapped_Reads	At_P_Normalized_TotalCounts	At_P_Normalized_TMM
#Total				12343451	7486104
aten_s0510.g4	limbic system-associated membrane protein-like isoform X1	3072	414753	251541	319598
aten_s0038.g77		2388	319485	193763	246187
aten_s0009.g61	ubiquitin-60S ribosomal protein L40	1739	267667	162336	206257
aten_s0329.g15	ubiquitin-like-conjugating enzyme ATG10 isoform X1	1281	254380	154277	196019
aten_s0244.g12	polyubiquitin-C	1815	251067	152268	193466
aten_s0510.g2		1221	174733	105973	134645
aten_s0890.g1		2121	169872	103025	130899
aten_s0089.g40		700	155590	94362.8	119894
aten_s0198.g8		2457	153745	93243.9	118472
aten_s0510.g3		2787	150228	91110.9	115762
aten_s0027.g69	40S ribosomal protein S25-like	473	143981	87322.2	110948
aten_s0634.g2		515	123848	75111.8	95434
aten_s0092.g36	60S ribosomal protein L27a-like	699	103629	62849.3	79853.8
aten_s0088.g33	40S ribosomal protein S14	684	102075	61906.8	78656.3
aten_s0039.g102		1895	99044	60068.6	76320.7
aten_s0013.g132	actin, cytoplasmic-like	1800	97558	59167.4	75175.6
aten_s0088.g50	MAM and LDL-receptor class A domain-containing protein 2	28848	90808	55073.6	69974.3
aten_s0133.g42	actin, cytoplasmic-like	1855	83394	50577.1	64261.2
aten_s0047.g4		3140	82673	50139.8	63705.7
aten_s0015.g69	ubiquitin-40S ribosomal protein S27a	787	73178	44381.3	56389.1
aten_s0014.g134		914	72993	44269.1	56246.5
aten_s0271.g10		1326	66478	40317.8	51226.2
aten_s0013.g73	actin CyI, cytoplasmic	1606	60160	36486.1	46357.7
aten_s0133.g41	actin-3	2756	58379	35405.9	44985.3
aten_s0149.g25	aryl hydrocarbon receptor nuclear translocator homolog isoform X1	4375	52500	31840.4	40455.1
aten_s0313.g10	putative RNA-binding protein Luc7-like 2 isoform X2	2308	52172	31641.5	40202.4
aten_s0234.g18		3737	46302	28081.4	35679.1
aten_s0094.g60	elongation factor 1-alpha	2352	45254	27445.8	34871.5
aten_s0212.g29	mediator of RNA polymerase II transcription subunit 25-like isoform X1	3447	43223	26214.1	33306.5
aten_s0052.g99	neuroblast differentiation-associated protein AHNAK-like	12021	40793	24740.3	31434
aten_s0008.g46	lysophospholipid acyltransferase 7-like	1746	40195	24377.6	30973.2
aten_s0007.g16		1051	38064	23085.2	29331.1
aten_s0013.g74	actin CyI, cytoplasmic	2174	37607	22808	28979
aten_s0291.g11		4211	37386	22674	28808.7
aten_s0012.g136	acidic repeat-containing protein-like	1703	36765	22297.4	28330.1
aten_s0040.g72	lipoxygenase homology domain-containing protein 1-like	5440	36707	22262.2	28285.5
aten_s0038.g46	DELTA-alicitoxin-Pse2b-like	1959	36056	21867.4	27783.8
aten_s0276.g12	40S ribosomal protein S23	859	35887	21764.9	27653.6
aten_s0040.g67	WD repeat-containing protein 47-like isoform X1	5563	35232	21367.6	27148.9
aten_s0009.g84	centromere protein J-like isoform X7	5325	33436	20278.4	25764.9
aten_s0009.g31	WASH complex subunit 2-like isoform X2	6114	32203	19530.6	24814.8
aten_s0064.g18	L-galactose dehydrogenase-like	2026	32138	19491.2	24764.7
aten_s0024.g66		1932	31602	19166.1	24351.7
aten_s0001.g153	calcineurin-binding protein cabin-1-like isoform X2	7188	31056	18835	23930.9
aten_s0067.g87		1269	29750	18042.9	22924.6
aten_s0306.g27	transmembrane protein 64-like	1902	29302	17771.2	22579.4
aten_s0007.g101	tubulin alpha-1A chain isoform X2	1549	29136	17670.5	22451.4
aten_s0038.g107	dnaJ homolog subfamily B member 6-like	2306	28974	17572.3	22326.6
aten_s0078.g21		21756	28018	16992.5	21589.9
aten_s0009.g9	A disintegrin and metalloproteinase with thrombospondin motifs 6-like isoform X4	4015	27692	16794.8	21338.7
aten_s0010.g177	nicotinamide/nicotinic acid mononucleotide adenylyltransferase 1-like	2501	27597	16737.1	21265.5
aten_s0068.g7	tectonin beta-propeller repeat-containing protein 1-like isoform X1	4663	27506	16681.9	21195.4
aten_s0035.g74	tubulin beta-4B chain-like	1653	27429	16635.2	21136.1
aten_s0057.g46		370	26977	16361.1	20787.8
aten_s0162.g36		526	26219	15901.4	20203.7
aten_s0115.g38	tyrosine-protein kinase SRK2-like isoform X1	3835	25888	15700.7	19948.6
aten_s0044.g33		13493	25586	15517.5	19715.9
aten_s0028.g78	tubulin beta chain-like	2161	25526	15481.1	19669.7
aten_s0049.g15	tyrosyl-DNA phosphodiesterase 2-like	1650	25497	15463.5	19647.3
aten_s0139.g34	collagen alpha-1(XVII) chain-like	1955	25402	15405.9	19574.1
aten_s0012.g93	schlafen family member 11-like isoform X2	2089	24887	15093.6	19177.3
aten_s0106.g22	ribosome biogenesis protein NSA2 homolog	1586	24308	14742.4	18731.1
aten_s0282.g5	mucin-2-like isoform X1	3199	24144	14642.9	18604.7
aten_s0035.g70		686	23353	14163.2	17995.2
aten_s0125.g43	transcription factor 7-like 2 isoform X3	4238	23194	14066.8	17872.7
aten_s0327.g6		1723	22588	13699.3	17405.7
aten_s0005.g320	disks large homolog 1-like isoform X1	5326	22075	13388.1	17010.4
aten_s0260.g14	tropomyosin-like	1927	21819	13232.9	16813.2
aten_s0031.g96	elongation factor 2-like	3316	21476	13024.8	16548.8
aten_s0294.g12	ATP synthase subunit beta, mitochondrial	2202	21089	12790.1	16250.6
aten_s0029.g123		3094	21016	12745.9	16194.4
aten_s0035.g73	tubulin beta-4B chain-like	1713	21014	12744.7	16192.8
aten_s0224.g3	bifunctional purine biosynthesis protein PURH-like isoform X1	3068	20902	12676.7	16106.5
aten_s0027.g91	peroxisome biogenesis factor 1-like isoform X1	5617	20660	12530	15920.1
aten_s0004.g18	tyrosine-protein kinase receptor Tie-1-like	2295	20514	12441.4	15807.6
aten_s0022.g39	GTP-binding protein ypt2-like	3329	20511	12439.6	15805.2
aten_s0029.g19	neuronal PAS domain-containing protein 2-like	6300	20500	12432.9	15796.8
aten_s0107.g39	elastin-like isoform X1	4307	20034	12150.3	15437.7
aten_s0005.g88	tetratricopeptide repeat protein 4-like isoform X1	1999	19516	11836.1	15038.5
aten_s0001.g92		2219	19028	11540.2	14662.5
aten_s0099.g40	transcriptional regulator ATRX homolog	6136	18556	11253.9	14298.8
aten_s0085.g99	E3 ubiquitin-protein ligase UBR4-like	15555	18252	11069.5	14064.5
aten_s0112.g25	heat shock protein HSP 90-alpha-like	4842	18014	10925.2	13881.1
aten_s0029.g199	NADP-dependent oxidoreductase domain-containing protein 1-like	3135	17744	10761.4	13673.1
aten_s0029.g89	40S ribosomal protein S3	836	17624	10688.7	13580.6
aten_s0219.g11	LOW QUALITY PROTEIN: forkhead-associated domain-containing protein 1-like	4692	16922	10262.9	13039.7
aten_s0051.g61	S phase cyclin A-associated protein in the endoplasmic reticulum-like isoform X1	2749	16576	10053.1	12773
aten_s0055.g72	28S ribosomal protein S14, mitochondrial-like	1938	16533	10027	12739.9
aten_s0168.g27	LOW QUALITY PROTEIN: CREB-binding protein-like	7280	16502	10008.2	12716
aten_s0009.g22	dual specificity tyrosine-phosphorylation-regulated kinase 1A-like	4377	16426	9962.1	12657.4
aten_s0009.g197	helicase SRCAP-like	9677	16337	9908.13	12588.9
aten_s0159.g4	meckelin-like	4176	16070	9746.2	12383.1
aten_s0096.g10	rab-like protein 6 isoform X2	3083	15896	9640.67	12249
aten_s0125.g27	extracellular calcium-sensing receptor-like	2985	15812	9589.72	12184.3
aten_s0031.g90	histone H3	616	15808	9587.3	12181.2
aten_s0398.g1		5402	15772	9565.46	12153.5
aten_s0437.g7	protein NLRC3-like	1093	15268	9259.8	11765.1
aten_s0043.g135		1430	14958	9071.79	11526.2
aten_s0189.g8	WD repeat-containing protein 38-like	3204	14847	9004.47	11440.7
aten_s0021.g26		2221	14327	8689.09	11040
aten_s0009.g28	beta-arrestin-1-like isoform X1	2739	13982	8479.86	10774.2
aten_s0008.g125	endoplasmic reticulum chaperone BiP-like	2633	13876	8415.57	10692.5
aten_s0005.g194		2209	13795	8366.45	10630.1
aten_s0052.g139	protein phosphatase 2C-like domain-containing protein 1	2297	13332	8085.64	10273.3
aten_s0039.g103		704	13105	7947.97	10098.4
aten_s0264.g13		907	13084	7935.24	10082.2
aten_s0230.g34	kinesin-like protein KIF28P	5094	12908	7828.49	9946.57
aten_s0012.g111	radixin-like	3259	12791	7757.54	9856.41
aten_s0068.g39	trichohyalin-like isoform X1	2141	12734	7722.97	9812.49
aten_s0261.g23		3003	12727	7718.72	9807.09
aten_s0105.g25		1405	12678	7689	9769.34
aten_s0124.g3	myelin expression factor 2-like	3504	12556	7615.01	9675.33
aten_s0294.g5		725	12456	7554.36	9598.27
aten_s0028.g145		2377	12456	7554.36	9598.27
aten_s0012.g150	UBX domain-containing protein 11-like	1380	12340	7484.01	9508.88
aten_s0153.g32	Krueppel-like factor 11 isoform X2	2461	12086	7329.96	9313.16
aten_s0084.g101	PAX-interacting protein 1-like	3304	11906	7220.8	9174.45
aten_s0052.g7	ras-related protein Rab-1A-like	1919	11708	7100.71	9021.88
aten_s0322.g1	LOW QUALITY PROTEIN: E3 ubiquitin-protein ligase RNF213-like	9102	11634	7055.83	8964.86
aten_s0012.g135	X-linked retinitis pigmentosa GTPase regulator-like	3040	11586	7026.72	8927.87
aten_s0023.g87	E3 ubiquitin-protein ligase MIB2-like isoform X1	5898	11284	6843.56	8695.16
aten_s0157.g15	serine/threonine-protein phosphatase 6 regulatory ankyrin repeat subunit B-like isoform X3	2600	11268	6833.86	8682.83
aten_s0093.g7		2009	11113	6739.86	8563.39
aten_s0431.g14	Werner Syndrome-like exonuclease	1928	10932	6630.08	8423.91
aten_s0060.g44		1508	10926	6626.44	8419.29
aten_s0029.g116	HMG1/2-like protein	3176	10848	6579.14	8359.19
aten_s0084.g134	mucin-like protein isoform X3	5151	10806	6553.66	8326.82
aten_s0059.g10	kinesin-like protein KIN-14K	4868	10771	6532.44	8299.85
aten_s0133.g77	microtubule-associated protein futsch-like isoform X3	10179	10568	6409.32	8143.42
aten_s0071.g3	volume-regulated anion channel subunit LRRC8C-like isoform X1	2043	10481	6356.56	8076.38
aten_s0022.g88	F-box/WD repeat-containing protein 7-like	2582	10428	6324.41	8035.54
aten_s0243.g12	acyl-CoA-binding protein-like	403	10384	6297.73	8001.64
aten_s0464.g8		1647	10370	6289.24	7990.85
aten_s0047.g3		2396	10367	6287.42	7988.54
aten_s0060.g69	activin receptor type-2B-like	3157	10343	6272.86	7970.05
aten_s0513.g3		2067	10326	6262.55	7956.95
aten_s0065.g67	protein CBFA2T3-like isoform X6	3027	10092	6120.64	7776.63
aten_s0041.g108		532	9896	6001.76	7625.6
aten_s0098.g16	CD63 antigen-like	2235	9827	5959.92	7572.43
aten_s0010.g137	erythroid differentiation-related factor 1-like	5433	9804	5945.97	7554.71
aten_s0104.g35		15158	9794	5939.9	7547
aten_s0534.g3		1793	9746	5910.79	7510.01
aten_s0092.g55	voltage-dependent L-type calcium channel subunit beta-2-like isoform X2	2428	9598	5821.03	7395.97
aten_s0145.g19	stimulated by retinoic acid gene 6 protein-like	576	9544	5788.28	7354.36
aten_s0675.g2	Retrovirus-related Pol polyprotein from transposon TNT 1-94.*Nicotiana tabacum OX=4097 PE=2 SV=1	4840	9522	5774.94	7337.4
aten_s0237.g17	histone H3	537	9428	5717.93	7264.97
aten_s0243.g25		4087	9418	5711.87	7257.26
aten_s0004.g66	cathepsin L1-like	2018	9120	5531.13	7027.63
aten_s0139.g71	ATM interactor-like	2466	9100	5519	7012.22
aten_s0001.g258	beta-glucuronidase-like	2448	8904	5400.13	6861.19
aten_s0047.g139	kelch-like protein 26	2357	8878	5384.36	6841.15
aten_s0161.g44	solute carrier family 23 member 2-like	4249	8800	5337.06	6781.05
aten_s0025.g72		1422	8762	5314.01	6751.77
aten_s0151.g12	YTH domain-containing protein 1-like isoform X2	3249	8583	5205.45	6613.84
aten_s0172.g24	stress-70 protein, mitochondrial-like	2960	8575	5200.6	6607.67
aten_s0094.g49	centromere-associated protein E-like	10916	8558	5190.29	6594.57
aten_s0027.g42		1512	8456	5128.43	6515.97
aten_s0125.g31	cytosolic carboxypeptidase 2-like	3897	8445	5121.76	6507.5
aten_s0033.g8	adenylate kinase 8-like	1575	8438	5117.51	6502.1
aten_s0209.g3	heat shock cognate 71 kDa protein-like	2998	8326	5049.58	6415.8
aten_s0012.g183	regulation of nuclear pre-mRNA domain-containing protein 2-like	4422	8319	5045.34	6410.4
aten_s0049.g95	disks large homolog 5-like	6649	8220	4985.3	6334.12
aten_s0062.g7	tumor necrosis factor receptor superfamily member 4-like	2498	8188	4965.89	6309.46
aten_s0081.g24	tetratricopeptide repeat protein 28-like	5029	8098	4911.31	6240.11
aten_s0320.g5	Retrovirus-related Pol polyprotein from transposon opus.*Drosophila melanogaster OX=7227 GN=pol PE=4 SV=1	3929	8050	4882.2	6203.12
aten_s0120.g23	probable ribosome biogenesis protein RLP24 isoform X2	1538	7956	4825.19	6130.69
aten_s0028.g24	proteasome subunit beta type-3-like	1275	7868	4771.82	6062.88
aten_s0063.g23	UPF0547 protein C16orf87 homolog	683	7831	4749.38	6034.36
aten_s0013.g37	tropomyosin alpha-4 chain-like	2088	7776	4716.02	5991.98
aten_s0034.g87	serine/threonine-protein phosphatase alpha-2 isoform isoform X2	2844	7762	4707.53	5981.19
aten_s0043.g69	sodium channel protein 1 brain-like	5195	7756	4703.89	5976.57
aten_s0106.g55	putative histone-lysine N-methyltransferase PRDM6	2945	7752	4701.46	5973.49
aten_s0021.g90		811	7662	4646.88	5904.14
aten_s0015.g190		4386	7633	4629.29	5881.79
aten_s0228.g7		3983	7595	4606.25	5852.51
aten_s0104.g44		2760	7586	4600.79	5845.57
aten_s0448.g5	myb-related transcription factor, partner of profilin-like	1821	7426	4503.75	5722.28
aten_s0170.g50	LOW QUALITY PROTEIN: receptor-type tyrosine-protein phosphatase F-like	5606	7348	4456.44	5662.18
aten_s0045.g47	nuclear pore complex protein Nup133-like isoform X1	3998	7298	4426.12	5623.65
aten_s0008.g18	ras-related protein Rab-28-like	2156	7259	4402.47	5593.6
aten_s0018.g55	DNA polymerase zeta catalytic subunit-like isoform X1	9956	7248	4395.8	5585.12
aten_s0048.g74	adrenocorticotropic hormone receptor-like	3125	7204	4369.11	5551.21
aten_s0006.g233		499	7188	4359.41	5538.88
aten_s0119.g22	glycylpeptide N-tetradecanoyltransferase 1-like	2984	7186	4358.19	5537.34
aten_s0028.g191	PRELI domain-containing protein 1, mitochondrial-like	912	7152	4337.57	5511.14
aten_s0022.g67	lysophosphatidic acid phosphatase type 6-like	1984	7090	4299.97	5463.37
aten_s0069.g78	interferon-inducible GTPase 1-like isoform X1	1674	7088	4298.76	5461.83
aten_s0062.g23	eukaryotic translation initiation factor 5B-like	3177	7060	4281.78	5440.25
aten_s0063.g35	cytoplasmic polyadenylation element-binding protein 2-like	4158	7030	4263.58	5417.13
aten_s0083.g3		4959	7025	4260.55	5413.28
aten_s0037.g83	eukaryotic translation initiation factor 2 subunit 2-like	1829	6985	4236.29	5382.46
aten_s0608.g1	protein strawberry notch homolog 1-like	2851	6924	4199.29	5335.45
aten_s0067.g116	B-cell linker protein-like isoform X1	3785	6893	4180.49	5311.57
aten_s0003.g56	MKRN2 opposite strand protein-like	1210	6864	4162.91	5289.22
aten_s0049.g16		33136	6789	4117.42	5231.43
aten_s0043.g61	ubiquitin-like protein FUBI	545	6773	4107.72	5219.1
aten_s0183.g29	acyl-lipid (8-3)-desaturase-like	2576	6724	4078	5181.34
aten_s0153.g19	gastrula zinc finger protein xLCGF3.1-like	2549	6692	4058.59	5156.68
aten_s0007.g38	LOW QUALITY PROTEIN: A-kinase anchor protein 9-like	18260	6677	4049.49	5145.12
aten_s0095.g20		2818	6672	4046.46	5141.27
aten_s0157.g51		2348	6644	4029.48	5119.69
aten_s0284.g9		4101	6638	4025.84	5115.07
aten_s0108.g71	disheveled-associated activator of morphogenesis 2-like	5336	6591	3997.34	5078.85
aten_s0090.g3		482	6524	3956.7	5027.22
aten_s0013.g4	E3 ubiquitin-protein ligase RBBP6-like	5920	6508	3947	5014.89
aten_s0039.g6	DNA cross-link repair 1A protein-like	4024	6498	3940.93	5007.19
aten_s0090.g19		1350	6481	3930.62	4994.09
aten_s0262.g25	protein strawberry notch homolog 1-like	2567	6464	3920.31	4980.99
aten_s0160.g24		3492	6454	3914.25	4973.28
aten_s0165.g41	60S ribosomal protein L10a-like	796	6445	3908.79	4966.35
aten_s0122.g1		2164	6444	3908.18	4965.58
aten_s0241.g21		2000	6384	3871.79	4919.34
aten_s0067.g163	serine/threonine-protein phosphatase CPPED1-like	4647	6382	3870.58	4917.8
aten_s0121.g15		2722	6324	3835.4	4873.11
aten_s0343.g2		3232	6301	3821.45	4855.39
aten_s0362.g2	actin-15B	1322	6245	3787.49	4812.23
aten_s0006.g70	endoplasmin-like	3684	6223	3774.15	4795.28
aten_s0286.g3	2-oxoglutarate dehydrogenase, mitochondrial-like	3815	6216	3769.9	4789.89
aten_s0268.g12	titin-like isoform X2	13485	6203	3762.02	4779.87
aten_s0101.g28	transformation/transcription domain-associated protein-like	11151	6202	3761.41	4779.1
aten_s0013.g167	Small RNA degrading nuclease 5.*Arabidopsis thaliana OX=3702 GN=SDN5 PE=2 SV=2	3209	6142	3725.02	4732.86
aten_s0110.g37		1530	6134	3720.17	4726.7
aten_s0221.g5	A-agglutinin anchorage subunit-like, partial	3980	6129	3717.14	4722.85
aten_s0308.g12		4895	6115	3708.65	4712.06
aten_s0235.g2	E3 ubiquitin-protein ligase UBR5-like	8505	6094	3695.91	4695.88
aten_s0124.g18	E3 ubiquitin-protein ligase MIB2-like	5006	6051	3669.83	4662.74
aten_s0126.g3		1999	6002	3640.12	4624.98
aten_s0037.g33		5991	5998	3637.69	4621.9
aten_s0069.g23	allene oxide synthase-lipoxygenase protein-like isoform X2	1940	5996	3636.48	4620.36
aten_s0065.g13	something about silencing protein 10-like isoform X1	1881	5933	3598.27	4571.81
aten_s0043.g111	probable protein phosphatase 2C 21	1875	5904	3580.68	4549.47
aten_s0042.g29	trichohyalin-like	23207	5888	3570.98	4537.14
aten_s0058.g97	ralA-binding protein 1-A-like	1484	5881	3566.73	4531.74
aten_s0049.g130	60S acidic ribosomal protein P1-like	1023	5876	3563.7	4527.89
aten_s0340.g17		3100	5863	3555.81	4517.87
aten_s0062.g70	CUB and zona pellucida-like domain-containing protein 1	3374	5856	3551.57	4512.48
aten_s0053.g79		56026	5831	3536.41	4493.22
aten_s0057.g18	60S acidic ribosomal protein P2-like	1646	5821	3530.34	4485.51
aten_s0093.g77	E3 ubiquitin-protein ligase MYLIP-like	2687	5782	3506.69	4455.46
aten_s0117.g39	RNA polymerase-associated protein LEO1-like isoform X1	2430	5771	3500.02	4446.98
aten_s0052.g82	tauropine dehydrogenase-like	1169	5769	3498.81	4445.44
aten_s0046.g48	myb/SANT-like DNA-binding domain-containing protein 4 isoform X1	3760	5723	3470.91	4409.99
aten_s0252.g7	LOW QUALITY PROTEIN: E3 ubiquitin-protein ligase HUWE1-like	15285	5649	3426.03	4352.97
aten_s0083.g25	BTB/POZ domain-containing protein KCTD6-like	2666	5593	3392.06	4309.82
aten_s0031.g115	ADAMTS-like protein 5	7648	5566	3375.69	4289.01
aten_s0259.g13	EGF domain-specific O-linked N-acetylglucosamine transferase-like	2603	5560	3372.05	4284.39
aten_s0018.g20	dynein heavy chain 5, axonemal-like isoform X2	15987	5548	3364.77	4275.14
aten_s0007.g209	LOW QUALITY PROTEIN: doublecortin domain-containing protein 1-like	6382	5542	3361.13	4270.52
aten_s0323.g2		9062	5524	3350.22	4256.65
aten_s0054.g2		3080	5462	3312.61	4208.87
aten_s0046.g61	WD repeat domain phosphoinositide-interacting protein 4-like isoform X2	2689	5439	3298.67	4191.15
aten_s0145.g18	stimulated by retinoic acid gene 6 protein-like	4795	5432	3294.42	4185.76
aten_s0138.g33		2428	5412	3282.29	4170.35
aten_s0002.g123	adenylate kinase 9-like	5414	5412	3282.29	4170.35
aten_s0026.g55	S-adenosylmethionine synthase-like	2649	5402	3276.23	4162.64
aten_s0282.g13		669	5382	3264.1	4147.23
aten_s0060.g32	ras-related protein Rab-13-like	1059	5368	3255.61	4136.44
aten_s0006.g76	IQ and AAA domain-containing protein 1-like	2775	5328	3231.35	4105.62
aten_s0504.g1	zinc finger protein GIS2-like	7393	5324	3228.92	4102.54
aten_s0162.g30	leucine-rich repeat extensin-like protein 3, partial	4086	5321	3227.1	4100.22
aten_s0030.g18	ATP-dependent zinc metalloprotease FTSH 4, mitochondrial-like	3742	5265	3193.14	4057.07
aten_s0142.g23		375	5261	3190.71	4053.99
aten_s0224.g6	formin-2-like	3038	5235	3174.94	4033.95
aten_s0069.g33	DNA damage-regulated autophagy modulator protein 2-like	1954	5199	3153.11	4006.21
aten_s0010.g116	coiled-coil domain-containing protein R3HCC1L-like isoform X2	2712	5199	3153.11	4006.21
aten_s0117.g44	abl interactor 1-like	2244	5175	3138.55	3987.72
aten_s0043.g89	MRG/MORF4L-binding protein-like isoform X2	1840	5158	3128.24	3974.62
aten_s0132.g55	ATP-binding cassette sub-family A member 3-like isoform X1	6874	5156	3127.03	3973.08
aten_s0033.g6		2163	5072	3076.09	3908.35
aten_s0025.g56		4400	5039	3056.07	3882.92
aten_s0133.g5	protein KIAA0556-like	3919	5031	3051.22	3876.76
aten_s0045.g32	caldesmon-like	3337	5022	3045.76	3869.82
aten_s0128.g27	hypoxia up-regulated protein 1-like	4122	5008	3037.27	3859.03
aten_s0063.g24	cGMP-specific 3',5'-cyclic phosphodiesterase-like	2218	4962	3009.37	3823.59
aten_s0069.g77	chondroitin sulfate synthase 1-like	2205	4960	3008.16	3822.05
aten_s0012.g43		1542	4937	2994.21	3804.32
aten_s0183.g35	heat shock factor protein 1-like isoform X2	3373	4919	2983.29	3790.45
aten_s0029.g150	Uncharacterized protein KIAA2026.*Homo sapiens OX=9606 GN=KIAA2026 PE=2 SV=2	6054	4904	2974.2	3778.89
aten_s0247.g21	alpha-methylacyl-CoA racemase-like	3110	4860	2947.51	3744.99
aten_s0172.g64	mitotic apparatus protein p62-like isoform X2	2619	4849	2940.84	3736.51
aten_s0047.g11		4210	4839	2934.78	3728.81
aten_s0021.g114	histone-lysine N-methyltransferase 2D-like isoform X1	16767	4816	2920.83	3711.08
aten_s0034.g43	telomeric repeat-binding factor 2-interacting protein 1-like isoform X1	3097	4814	2919.61	3709.54
aten_s0030.g126	kinesin-like protein KIF28P	3515	4792	2906.27	3692.59
aten_s0028.g160	villin-1-like	4494	4790	2905.06	3691.05
aten_s0094.g31	glutamine-dependent NAD(+) synthetase-like	3759	4788	2903.84	3689.51
aten_s0149.g18	mediator of RNA polymerase II transcription subunit 12-like	2227	4775	2895.96	3679.49
aten_s0009.g132		4966	4756	2884.44	3664.85
aten_s0077.g12	HCLS1-binding protein 3-like isoform X2	2819	4712	2857.75	3630.94
aten_s0041.g23	protein AF-9-like	3222	4693	2846.23	3616.3
aten_s0056.g77	ankyrin-1-like	4503	4692	2845.62	3615.53
aten_s0268.g3	paired mesoderm homeobox protein 2-like	1410	4682	2839.56	3607.83
aten_s0201.g20	low-density lipoprotein receptor-related protein 4-like isoform X3	5081	4677	2836.53	3603.97
aten_s0028.g11		4322	4664	2828.64	3593.96
aten_s0223.g32	inositol-3-phosphate synthase 1-A-like isoform X1	3790	4664	2828.64	3593.96
aten_s0022.g93	acetyl-CoA carboxylase-like	8154	4654	2822.58	3586.25
aten_s0094.g44	probable G-protein coupled receptor CG31760	1849	4616	2799.53	3556.97
aten_s0172.g75	heparanase-like isoform X1	3633	4614	2798.32	3555.43
aten_s0036.g45	polycystic kidney disease protein 1-like 2	13675	4596	2787.4	3541.56
aten_s0023.g93	adhesion G protein-coupled receptor L3-like	997	4592	2784.97	3538.48
aten_s0077.g43	60S acidic ribosomal protein P0-like	1093	4574	2774.06	3524.6
aten_s0362.g13		641	4568	2770.42	3519.98
aten_s0220.g18		1302	4564	2767.99	3516.9
aten_s0091.g35	glutamate receptor 2-like isoform X1	917	4564	2767.99	3516.9
aten_s0005.g293		3277	4562	2766.78	3515.36
aten_s0132.g16	NEDD8-conjugating enzyme UBE2F-like	1626	4557	2763.75	3511.51
aten_s0231.g14	F-BAR domain only protein 2-like	4824	4555	2762.53	3509.96
aten_s0007.g206	E3 ubiquitin-protein ligase RNF38-like isoform X1	2265	4545	2756.47	3502.26
aten_s0027.g14	zinc finger CCCH domain-containing protein 13-like	5126	4543	2755.26	3500.72
aten_s0329.g18	CUB domain-containing protein 2-like	1163	4540	2753.44	3498.41
aten_s0007.g111	acyl-CoA-binding domain-containing protein 5-like isoform X1	2228	4540	2753.44	3498.41
aten_s0015.g184		1085	4528	2746.16	3489.16
aten_s0294.g24	E3 ubiquitin-protein ligase HECW2-like isoform X2	7023	4517	2739.49	3480.68
aten_s0324.g11	PH-interacting protein-like	6312	4509	2734.64	3474.52
aten_s0007.g105	ubiquitin carboxyl-terminal hydrolase MINDY-3-like	1877	4506	2732.82	3472.21
aten_s0002.g8	solute carrier organic anion transporter family member 4A1-like	3372	4492	2724.33	3461.42
aten_s0052.g54	collectin-12-like isoform X3	2282	4484	2719.47	3455.25
aten_s0313.g25		1231	4476	2714.62	3449.09
aten_s0329.g17	ovochymase-2-like	1991	4452	2700.07	3430.59
aten_s0067.g111		3586	4422	2681.87	3407.48
aten_s0237.g16		678	4397	2666.71	3388.21
aten_s0096.g98		6990	4390	2662.46	3382.82
aten_s0197.g16	MAGUK p55 subfamily member 5-like isoform X2	5260	4385	2659.43	3378.97
aten_s0269.g21	transcription termination factor 1-like isoform X1	2233	4361	2644.88	3360.47
aten_s0154.g4		1445	4350	2638.2	3352
aten_s0109.g13	sorting nexin-27-like	2180	4338	2630.93	3342.75
aten_s0028.g92	YLP motif-containing protein 1-like isoform X2	7286	4334	2628.5	3339.67
aten_s0162.g24		3409	4329	2625.47	3335.81
aten_s0060.g57		2902	4310	2613.95	3321.17
aten_s0052.g53		1752	4302	2609.09	3315.01
aten_s0029.g110		5153	4292	2603.03	3307.3
aten_s0101.g3	tubulin alpha-1A chain-like	1778	4287	2600	3303.45
aten_s0314.g8	cell division control protein 42 homolog	2644	4268	2588.47	3288.81
aten_s0231.g29	bone morphogenetic protein 1-like	1312	4250	2577.56	3274.94
aten_s0255.g1	TPR and ankyrin repeat-containing protein 1-like	11950	4238	2570.28	3265.69
aten_s0508.g1		1204	4236	2569.07	3264.15
aten_s0209.g21	protein ABHD18-like	1642	4218	2558.15	3250.28
aten_s0162.g6	FK506-binding protein 15-like isoform X2	4271	4214	2555.72	3247.2
aten_s0009.g165	E3 ubiquitin-protein ligase rnf146-like	2273	4188	2539.95	3227.16
aten_s0352.g7	NLR family CARD domain-containing protein 4-like	2856	4183	2536.92	3223.31
aten_s0232.g13	prolactin-releasing peptide receptor-like	3333	4180	2535.1	3221
aten_s0005.g242	cilia- and flagella-associated protein 44-like isoform X1	7875	4167	2527.22	3210.98
aten_s0001.g67		3201	4166	2526.61	3210.21
aten_s0183.g9		773	4122	2499.93	3176.31
aten_s0205.g30	vesicular inhibitory amino acid transporter-like	6069	4099	2485.98	3158.58
aten_s0076.g5	battenin-like	2658	4093	2482.34	3153.96
aten_s0047.g93	LOW QUALITY PROTEIN: golgin subfamily A member 4-like	13013	4072	2469.6	3137.78
aten_s0164.g10	kelch-like protein 12	2939	4060	2462.32	3128.53
aten_s0031.g98		2055	4046	2453.83	3117.74
aten_s0058.g73	2-aminomuconic semialdehyde dehydrogenase-like isoform X2	2283	4034	2446.56	3108.49
aten_s0047.g100	mediator of RNA polymerase II transcription subunit 19-like	2895	3989	2419.26	3073.82
aten_s0130.g40		1252	3985	2416.84	3070.74
aten_s0371.g21		2642	3967	2405.92	3056.87
aten_s0368.g5	metalloendopeptidase OMA1, mitochondrial-like	2734	3963	2403.5	3053.78
aten_s0050.g70		4844	3959	2401.07	3050.7
aten_s0013.g6	WD repeat-containing protein 90-like	6798	3934	2385.91	3031.44
aten_s0328.g4	UPF0565 protein C2orf69 homolog isoform X1	1697	3924	2379.84	3023.73
aten_s0002.g29	synaptotagmin-like protein 2	3987	3913	2373.17	3015.26
aten_s0036.g51	eukaryotic translation initiation factor 4E transporter-like isoform X4	5206	3910	2371.35	3012.94
aten_s0191.g23	Membrane protein FAM174.*Xenopus laevis OX=8355 GN=fam174 PE=2 SV=1	2190	3886	2356.8	2994.45
aten_s0003.g169		2250	3869	2346.49	2981.35
aten_s0021.g136	UBX domain-containing protein 4-like isoform X3	2583	3866	2344.67	2979.04
aten_s0032.g23	tubulin alpha-1D chain-like	1543	3840	2328.9	2959
aten_s0004.g123		2514	3839	2328.29	2958.23
aten_s0026.g81	unconventional myosin-VIIa-like isoform X4	1540	3789	2297.97	2919.7
aten_s0117.g34	probable ATP-dependent RNA helicase DDX46	3819	3780	2292.51	2912.77
aten_s0181.g23	nuclear factor related to kappa-B-binding protein-like isoform X1	3122	3779	2291.9	2912
aten_s0024.g91	acidic leucine-rich nuclear phosphoprotein 32 family member B-like	2570	3769	2285.84	2904.29
aten_s0031.g87	histone H2B, gonadal-like	850	3732	2263.4	2875.78
aten_s0068.g23	adiponectin receptor protein 1-like	2224	3726	2259.76	2871.16
aten_s0038.g21	V-type proton ATPase subunit B	2214	3716	2253.69	2863.45
aten_s0014.g115	zinc finger matrin-type protein 2-like	1552	3710	2250.06	2858.83
aten_s0106.g47	centrosomal protein of 120 kDa-like	5181	3708	2248.84	2857.29
aten_s0002.g199	terminal nucleotidyltransferase 5C-like	4909	3688	2236.71	2841.88
aten_s0165.g40	tyrosine-protein phosphatase non-receptor type 13-like	9092	3687	2236.11	2841.11
aten_s0042.g10	ceramide synthase 1-like	4169	3682	2233.07	2837.25
aten_s0371.g1	trichohyalin-like	4176	3676	2229.43	2832.63
aten_s0776.g1		240	3670	2225.8	2828.01
aten_s0013.g108	40S ribosomal protein S9	1540	3664	2222.16	2823.38
aten_s0410.g10		1904	3662	2220.94	2821.84
aten_s0063.g51	myb-like protein V	3782	3642	2208.81	2806.43
aten_s0119.g23	protein BTN1-like	2959	3632	2202.75	2798.72
aten_s0007.g180	ubiquitin carboxyl-terminal hydrolase 36-like	4439	3616	2193.05	2786.4
aten_s0120.g5	paired box protein Pax-3-B-like	2108	3605	2186.37	2777.92
aten_s0048.g7	piggyBac transposable element-derived protein 4-like	2845	3603	2185.16	2776.38
aten_s0136.g19	SH2 domain-containing protein 4B-like	3594	3589	2176.67	2765.59
aten_s0372.g9	ankyrin repeat domain-containing protein 17-like isoform X2	6495	3586	2174.85	2763.28
aten_s0031.g110		7448	3571	2165.75	2751.72
aten_s0042.g20	ketohexokinase-like	1429	3570	2165.15	2750.95
aten_s0084.g121	ras and EF-hand domain-containing protein homolog isoform X10	5435	3570	2165.15	2750.95
aten_s0014.g85	potassium channel subfamily T member 2-like	3903	3566	2162.72	2747.87
aten_s0062.g74	mediator of RNA polymerase II transcription subunit 12-like protein isoform X1	4119	3565	2162.12	2747.1
aten_s0005.g126		1209	3556	2156.66	2740.16
aten_s0360.g7	ankyrin repeat domain-containing protein 17-like	2451	3552	2154.23	2737.08
aten_s0300.g9	transmembrane protein KIAA1109 homolog	16546	3546	2150.59	2732.45
aten_s0318.g3		8315	3534	2143.31	2723.21
aten_s0001.g347	14-3-3 protein 3-like	2700	3534	2143.31	2723.21
aten_s0003.g227	BTB/POZ domain-containing protein 6-like	2150	3516	2132.4	2709.34
aten_s0028.g151	ras-related protein Rab-5B-like	2548	3513	2130.58	2707.03
aten_s0012.g142	Secreted acidic protein 2 (Fragment).*Acropora millepora OX=45264 PE=1 SV=1	1998	3498	2121.48	2695.47
aten_s0350.g7	protein Wnt-1-like isoform X1	2349	3484	2112.99	2684.68
aten_s0172.g18	drebrin-like protein B isoform X1	2475	3462	2099.65	2667.73
aten_s0028.g38	homeobox protein OTX2-like isoform X1	2190	3451	2092.98	2659.25
aten_s0107.g71	annexin-B12-like	3464	3448	2091.16	2656.94
aten_s0044.g125	symplekin-like	4962	3446	2089.94	2655.4
aten_s0092.g50	PHD and RING finger domain-containing protein 1-like isoform X1	3893	3428	2079.03	2641.53
aten_s0075.g36		433	3410	2068.11	2627.66
aten_s0021.g145	LOW QUALITY PROTEIN: SWI/SNF-related matrix-associated actin-dependent regulator of chromatin subfamily E member 1-like	2899	3407	2066.29	2625.35
aten_s0059.g105	serum paraoxonase/arylesterase 1-like	1840	3404	2064.47	2623.03
aten_s0191.g32	prominin-1-like isoform X1	3801	3403	2063.86	2622.26
aten_s0203.g13		969	3399	2061.44	2619.18
aten_s0189.g20	phospholipid phosphatase 6-like	1609	3382	2051.13	2606.08
aten_s0072.g5	degenerin-like protein asic-1	2325	3364	2040.21	2592.21
aten_s0018.g71	putative E3 ubiquitin-protein ligase UBR7	2047	3356	2035.36	2586.05
aten_s0019.g95	cytosolic purine 5'-nucleotidase-like isoform X5	2835	3346	2029.3	2578.34
aten_s0099.g55	carbohydrate sulfotransferase 1-like	3327	3340	2025.66	2573.72
aten_s0086.g85	ankyrin repeat domain-containing protein 13C-like isoform X1	4447	3330	2019.59	2566.01
aten_s0059.g23	midasin-like	16705	3299	2000.79	2542.12
aten_s0114.g45	prostatic spermine-binding protein-like isoform X1	1424	3290	1995.33	2535.19
aten_s0276.g7	plasma membrane calcium-transporting ATPase 3-like isoform X2	6067	3276	1986.84	2524.4
aten_s0045.g19	39S ribosomal protein L30, mitochondrial-like	1514	3276	1986.84	2524.4
aten_s0180.g11	RNA-binding protein 25-like	2272	3270	1983.2	2519.78
aten_s0286.g4	UPF0728 protein v1g117062-like	564	3260	1977.14	2512.07
aten_s0001.g28	LOW QUALITY PROTEIN: ADP-ribosylation factor-like protein 6-interacting protein 4	1771	3258	1975.92	2510.53
aten_s0003.g93	nuclear envelope pore membrane protein POM 121C-like	4261	3257	1975.32	2509.76
aten_s0013.g184		1213	3250	1971.07	2504.37
aten_s0096.g101	dnaJ homolog subfamily C member 2-like	1979	3244	1967.43	2499.74
aten_s0034.g138	protein unc-93 homolog A-like	1883	3240	1965.01	2496.66
aten_s0095.g33	utrophin-like isoform X1	13641	3232	1960.16	2490.49
aten_s0035.g130	E3 ubiquitin-protein ligase ZNRF2-like	2977	3232	1960.16	2490.49
aten_s0108.g21	insulinoma-associated protein 1-like	3610	3228	1957.73	2487.41
aten_s0205.g5		2860	3208	1945.6	2472
aten_s0444.g2		3592	3206	1944.39	2470.46
aten_s0112.g13	Tau-tubulin kinase 1.*Homo sapiens OX=9606 GN=TTBK1 PE=1 SV=2	5086	3192	1935.9	2459.67
aten_s0576.g1	zinc finger and BTB domain-containing protein 47-like, partial	766	3185	1931.65	2454.28
aten_s0010.g68	protein MAK16 homolog	1724	3180	1928.62	2450.42
aten_s0252.g13	LOW QUALITY PROTEIN: trichohyalin-like	9285	3167	1920.73	2440.41
aten_s0079.g78	ras-related protein Rab-3-like	2658	3164	1918.91	2438.1
aten_s0111.g62	nucleolar protein 58-like	2807	3155	1913.46	2431.16
aten_s0006.g167		937	3153	1912.24	2429.62
aten_s0074.g47		15907	3152	1911.64	2428.85
aten_s0062.g52		1935	3152	1911.64	2428.85
aten_s0083.g91	coiled-coil domain-containing protein 186-like isoform X2	4749	3136	1901.93	2416.52
aten_s0091.g68	transcription elongation factor SPT6-like isoform X2	5743	3125	1895.26	2408.04
aten_s0079.g101		2754	3118	1891.02	2402.65
aten_s0067.g110	charged multivesicular body protein 3-like	2733	3113	1887.98	2398.8
aten_s0023.g29		2125	3076	1865.54	2370.29
aten_s0183.g39	rotatin-like	7363	3063	1857.66	2360.27
aten_s0002.g238	protein kinase C and casein kinase substrate in neurons protein 1-like	2433	3063	1857.66	2360.27
aten_s0228.g5		5060	3062	1857.05	2359.5
aten_s0044.g44	calcium-independent protein kinase C-like	2516	3060	1855.84	2357.96
aten_s0084.g5	endothelin-converting enzyme homolog isoform X2	5039	3048	1848.56	2348.71
aten_s0201.g26		2312	3047	1847.96	2347.94
aten_s0060.g51	bromodomain adjacent to zinc finger domain protein 2B-like isoform X2	8697	3040	1843.71	2342.54
aten_s0107.g31		2067	3038	1842.5	2341
aten_s0121.g23	ubiquitin carboxyl-terminal hydrolase 34-like	11815	3036	1841.29	2339.46
aten_s0015.g160		1315	3034	1840.07	2337.92
aten_s0013.g93	fas-binding factor 1 homolog isoform X2	5153	3022	1832.79	2328.67
aten_s0157.g48	centrosome and spindle pole-associated protein 1-like isoform X1	4229	3014	1827.94	2322.51
aten_s0093.g60	protein piccolo-like	3343	3014	1827.94	2322.51
aten_s0858.g1	LOW QUALITY PROTEIN: polyadenylate-binding protein 4-like	1864	3002	1820.66	2313.26
aten_s0180.g42	G patch domain-containing protein 11-like isoform X1	1252	2994	1815.81	2307.1
aten_s0017.g47	phosphatidylinositol 4,5-bisphosphate 3-kinase catalytic subunit beta isoform-like	3801	2968	1800.04	2287.06
aten_s0006.g195	Fibronectin type III domain-containing protein.*Acropora millepora OX=45264 PE=1 SV=1	5877	2960	1795.19	2280.9
aten_s0015.g170	bromodomain adjacent to zinc finger domain protein 1A-like	6788	2947	1787.31	2270.88
aten_s0049.g174	Transcription factor NF-E2 45 kDa subunit.*Rattus norvegicus OX=10116 GN=Nfe2 PE=2 SV=1	2565	2934	1779.42	2260.86
aten_s0007.g79	formin-like protein 20	3189	2932	1778.21	2259.32
aten_s0005.g268	cyclic nucleotide-gated cation channel alpha-3-like isoform X1	3358	2930	1777	2257.78
aten_s0058.g94	beta-1,4-galactosyltransferase 4-like	2270	2926	1774.57	2254.7
aten_s0029.g177	piggyBac transposable element-derived protein 4-like	3531	2924	1773.36	2253.16
aten_s0009.g40	transmembrane protein 232-like	3157	2907	1763.05	2240.06
aten_s0003.g89		1440	2901	1759.41	2235.43
aten_s0077.g2	death-inducer obliterator 1-like	3331	2892	1753.95	2228.5
aten_s0050.g65	LOW QUALITY PROTEIN: protein NLRC3-like	6390	2892	1753.95	2228.5
aten_s0108.g28	probable ATP-dependent RNA helicase DDX49	1968	2890	1752.74	2226.96
aten_s0063.g67	phosphatidylinositol transfer protein CSR1-like	2181	2878	1745.46	2217.71
aten_s0021.g61	splicing regulatory glutamine/lysine-rich protein 1-like isoform X2	2628	2872	1741.82	2213.09
aten_s0042.g25	zinc finger C3H1 domain-containing protein-like isoform X3	9160	2867	1738.79	2209.24
aten_s0027.g1	dedicator of cytokinesis protein 9-like isoform X3	8159	2859	1733.94	2203.07
aten_s0017.g41	rho guanine nucleotide exchange factor 10-like protein	7500	2858	1733.33	2202.3
aten_s0028.g79		6860	2856	1732.12	2200.76
aten_s0040.g11	leucine-rich repeat-containing G-protein coupled receptor 4-like isoform X1	2129	2838	1721.2	2186.89
aten_s0028.g97	ABC transporter G family member 33-like isoform X2	5659	2828	1715.14	2179.18
aten_s0312.g19	thymocyte nuclear protein 1-like	1525	2826	1713.92	2177.64
aten_s0180.g25	protein-glutamate O-methyltransferase-like	1463	2817	1708.47	2170.71
aten_s0072.g28	protocadherin Fat 4-like isoform X3	13173	2813	1706.04	2167.62
aten_s0034.g38		5262	2804	1700.58	2160.69
aten_s0101.g56	neuropilin-2-like	4565	2803	1699.97	2159.92
aten_s0681.g2		5606	2802	1699.37	2159.15
aten_s0005.g87	HAUS augmin-like complex subunit 3 isoform X2	2362	2802	1699.37	2159.15
aten_s0164.g33	sodium channel protein 1 brain-like isoform X1	6845	2801	1698.76	2158.38
aten_s0407.g2	TPR and ankyrin repeat-containing protein 1-like	10290	2796	1695.73	2154.52
aten_s0407.g4	TPR and ankyrin repeat-containing protein 1-like	8483	2790	1692.09	2149.9
aten_s0033.g86	protein SET-like	2896	2789	1691.48	2149.13
aten_s0003.g112	Uncharacterized protein MJ1628.*Methanocaldococcus jannaschii (strain ATCC 43067 / DSM 2661 / JAL-1 / JCM 10045 / NBRC 100440) OX=243232 GN=MJ1628 PE=4 SV=1	2237	2785	1689.06	2146.05
aten_s0022.g12		6079	2784	1688.45	2145.28
aten_s0065.g25	protein VAC14 homolog	1143	2778	1684.81	2140.65
aten_s0018.g38	noelin-like	2219	2776	1683.6	2139.11
aten_s0168.g40		1261	2774	1682.39	2137.57
aten_s0011.g181	phosphatidylinositide phosphatase SAC2-like	6896	2772	1681.17	2136.03
aten_s0046.g6		5151	2764	1676.32	2129.87
aten_s0644.g1	LOW QUALITY PROTEIN: serine/threonine-protein kinase Nek2-like	1586	2752	1669.04	2120.62
aten_s0028.g41	homeobox protein otx5-B-like isoform X2	2941	2747	1666.01	2116.77
aten_s0073.g32	5'-3' exoribonuclease 1-like isoform X1	6071	2740	1661.77	2111.37
aten_s0019.g73	dolichyl pyrophosphate Man9GlcNAc2 alpha-1,3-glucosyltransferase-like isoform X1	2438	2740	1661.77	2111.37
aten_s0093.g16	solute carrier family 25 member 44-like	3411	2739	1661.16	2110.6
aten_s0029.g12		5885	2736	1659.34	2108.29
aten_s0279.g3	serine/threonine-protein kinase Nek1-like	4433	2732	1656.91	2105.21
aten_s0321.g14		10302	2726	1653.28	2100.58
aten_s0416.g1		3380	2723	1651.46	2098.27
aten_s0068.g37	centromere-associated protein E-like	12642	2716	1647.21	2092.88
aten_s0244.g34	tetratricopeptide repeat protein 28-like	3832	2712	1644.78	2089.8
aten_s0007.g109	TRAF3-interacting protein 1-like isoform X3	2741	2705	1640.54	2084.4
aten_s0119.g19	protein AF-10-like isoform X1	4020	2703	1639.33	2082.86
aten_s0068.g47		971	2702	1638.72	2082.09
aten_s0407.g7	TPR and ankyrin repeat-containing protein 1-like	6091	2700	1637.51	2080.55
aten_s0096.g94	methionine aminopeptidase 2-like	1879	2678	1624.16	2063.6
aten_s0084.g88	chromatin-remodeling ATPase INO80-like	3542	2676	1622.95	2062.06
aten_s0221.g27	guanylate-binding protein 5-like, partial	4025	2666	1616.89	2054.35
aten_s0140.g32		1865	2656	1610.82	2046.64
aten_s0034.g14	E3 ubiquitin-protein ligase HERC2-like	14728	2648	1605.97	2040.48
aten_s0033.g39	syntaxin-binding protein 1-like	2694	2644	1603.54	2037.4
aten_s0031.g11	bromodomain-containing protein DDB_G0280777-like	3300	2642	1602.33	2035.86
aten_s0377.g6		2788	2640	1601.12	2034.31
aten_s0001.g342		4589	2640	1601.12	2034.31
aten_s0093.g1	immunoglobulin superfamily DCC subclass member 4-like isoform X2	4934	2634	1597.48	2029.69
aten_s0059.g32	serine/arginine-rich splicing factor 5-like	1942	2628	1593.84	2025.07
aten_s0141.g12		710	2624	1591.41	2021.99
aten_s0060.g3		2006	2612	1584.14	2012.74
aten_s0022.g42		606	2602	1578.07	2005.03
aten_s0022.g64	tropomodulin-3-like	2422	2591	1571.4	1996.56
aten_s0001.g59		13823	2582	1565.94	1989.62
aten_s0161.g10	PMS1 protein homolog 1-like	3463	2577	1562.91	1985.77
aten_s0017.g55	eukaryotic translation initiation factor 4 gamma 1-like	7388	2575	1561.7	1984.23
aten_s0046.g8	phosphoserine aminotransferase-like isoform X2	2140	2573	1560.48	1982.69
aten_s0172.g73		8177	2572	1559.88	1981.92
aten_s0044.g49	mitochondrial import receptor subunit TOM20 homolog	1657	2570	1558.66	1980.37
aten_s0341.g13	formin-J-like	8990	2561	1553.21	1973.44
aten_s0103.g28	glycine-rich cell wall structural protein-like	2475	2559	1551.99	1971.9
aten_s0117.g14		3280	2558	1551.39	1971.13
aten_s0201.g10	transcription activator BRG1-like	5573	2557	1550.78	1970.36
aten_s0412.g16	glycogenin-1-like isoform X1	2934	2556	1550.17	1969.59
aten_s0106.g60	transducin-like enhancer protein 1 isoform X1	4759	2555	1549.57	1968.82
aten_s0023.g16		1189	2552	1547.75	1966.5
aten_s0092.g54	E3 ubiquitin-protein ligase UBR5.*Homo sapiens OX=9606 GN=UBR5 PE=1 SV=2	9724	2550	1546.53	1964.96
aten_s0139.g77	pre-mRNA-splicing factor ATP-dependent RNA helicase DHX16-like	4775	2550	1546.53	1964.96
aten_s0150.g21	aminoacyl tRNA synthase complex-interacting multifunctional protein 2-like isoform X1	1735	2548	1545.32	1963.42
aten_s0195.g7	hepatocyte growth factor-regulated tyrosine kinase substrate-like isoform X1	1235	2546	1544.11	1961.88
aten_s0232.g17	putative helicase mov-10-B.1	5362	2540	1540.47	1957.26
aten_s0031.g124		9511	2540	1540.47	1957.26
aten_s0234.g22		4997	2538	1539.26	1955.72
aten_s0004.g41	DNA replication licensing factor mcm4-A-like	3324	2534	1536.83	1952.63
aten_s0091.g48		4775	2530	1534.4	1949.55
aten_s0103.g22		3948	2521	1528.95	1942.62
aten_s0247.g11	neuronal acetylcholine receptor subunit alpha-10-like	3528	2518	1527.13	1940.3
aten_s0030.g130	transmembrane protein 106B-like	2306	2516	1525.91	1938.76
aten_s0047.g1		3743	2513	1524.09	1936.45
aten_s0273.g8	tyrosine-protein kinase receptor TYRO3-like isoform X2	5633	2512	1523.49	1935.68
aten_s0084.g103		6613	2512	1523.49	1935.68
aten_s0146.g20	sacsin-like isoform X1	14202	2509	1521.67	1933.37
aten_s0064.g14	protein CDV3 homolog A-like	4060	2507	1520.46	1931.83
aten_s0107.g36	zinc finger homeobox protein 3-like isoform X3	1537	2505	1519.24	1930.29
aten_s0036.g53	eukaryotic translation initiation factor 3 subunit C-like	3687	2500	1516.21	1926.43
aten_s0326.g2		1798	2498	1515	1924.89
aten_s0318.g4	receptor-type tyrosine-protein phosphatase T-like	5574	2498	1515	1924.89
aten_s0006.g260		2369	2493	1511.96	1921.04
aten_s0016.g42		2481	2490	1510.14	1918.73
aten_s0247.g5	adhesion G-protein coupled receptor V1-like	19456	2488	1508.93	1917.19
aten_s0067.g61	nucleolar GTP-binding protein 1-like	2475	2484	1506.51	1914.11
aten_s0012.g26	protocadherin Fat 4-like isoform X2	7166	2478	1502.87	1909.48
aten_s0029.g77	restin homolog	5529	2478	1502.87	1909.48
aten_s0179.g21		2046	2473	1499.83	1905.63
aten_s0138.g44	TOG array regulator of axonemal microtubules protein 1-like	6833	2464	1494.38	1898.69
aten_s0004.g185	LOW QUALITY PROTEIN: leucine-rich repeat and IQ domain-containing protein 1-like	5330	2454	1488.31	1890.99
aten_s0064.g63		5646	2444	1482.25	1883.28
aten_s0058.g38	general transcription factor 3C polypeptide 1-like	8426	2443	1481.64	1882.51
aten_s0151.g40		2348	2434	1476.18	1875.58
aten_s0033.g46	LOW QUALITY PROTEIN: E3 ubiquitin-protein ligase RNF213-like	18300	2431	1474.36	1873.27
aten_s0289.g10	nucleoprotein TPR-like isoform X2	8344	2420	1467.69	1864.79
aten_s0089.g54	hepatoma-derived growth factor-related protein 2-like isoform X1	3707	2411	1462.23	1857.85
aten_s0169.g18	rDNA transcriptional regulator pol5-like isoform X1	5645	2408	1460.41	1855.54
aten_s0043.g139		3279	2404	1457.99	1852.46
aten_s0084.g71	rootletin-like	4963	2392	1450.71	1843.21
aten_s0248.g20		2161	2390	1449.5	1841.67
aten_s0071.g12	nuclear cap-binding protein subunit 1-like isoform X1	2980	2386	1447.07	1838.59
aten_s0069.g43	LOW QUALITY PROTEIN: DNA primase small subunit-like	2181	2384	1445.86	1837.05
aten_s0106.g59	protein SMG5-like	3877	2384	1445.86	1837.05
aten_s0009.g63	Dynein axonemal-associated protein 1.*Xenopus laevis OX=8355 GN=c16orf71 PE=1 SV=1	5898	2384	1445.86	1837.05
aten_s0381.g6		1981	2382	1444.64	1835.51
aten_s0049.g18		4892	2375	1440.4	1830.11
aten_s0001.g351	14-3-3 protein epsilon-like isoform X2	1649	2372	1438.58	1827.8
aten_s0043.g16	dentin sialophosphoprotein-like isoform X1	5351	2370	1437.37	1826.26
aten_s0135.g57	caprin-1-like	2344	2370	1437.37	1826.26
aten_s0107.g54		2075	2368	1436.15	1824.72
aten_s0010.g132	trichohyalin-like	3150	2368	1436.15	1824.72
aten_s0007.g10	microtubule-associated protein futsch-like	8653	2365	1434.33	1822.41
aten_s0183.g37	protein disulfide isomerase-like 2-2	1899	2364	1433.73	1821.64
aten_s0083.g87	heat shock protein 68-like	2214	2364	1433.73	1821.64
aten_s0042.g133	pre-mRNA-processing factor 40 homolog B-like	3050	2363	1433.12	1820.87
aten_s0243.g11	kinesin heavy chain-like isoform X1	6210	2353	1427.06	1813.16
aten_s0035.g13	transmembrane prolyl 4-hydroxylase-like	2766	2352	1426.45	1812.39
aten_s0275.g24		3690	2352	1426.45	1812.39
aten_s0101.g53		1053	2350	1425.24	1810.85
aten_s0336.g2	beta-1,3-galactosyltransferase 1-like isoform X2	1529	2348	1424.02	1809.31
aten_s0029.g50		6363	2348	1424.02	1809.31
aten_s0292.g9	DNA topoisomerase I, mitochondrial-like	4557	2345	1422.2	1807
aten_s0195.g13	DNA excision repair protein ERCC-6-like isoform X1	5276	2342	1420.39	1804.68
aten_s0132.g25	spectrin beta chain, non-erythrocytic 1-like isoform X2	12996	2340	1419.17	1803.14
aten_s0171.g15		1444	2331	1413.71	1796.21
aten_s0080.g41		8890	2326	1410.68	1792.35
aten_s0341.g9	nuclear receptor corepressor 2-like isoform X3	2946	2321	1407.65	1788.5
aten_s0233.g32	centrosomal protein of 290 kDa-like	11470	2321	1407.65	1788.5
aten_s0130.g5		9964	2318	1405.83	1786.19
aten_s0003.g186		46585	2318	1405.83	1786.19
aten_s0032.g65	alpha- and gamma-adaptin-binding protein p34-like isoform X1	2275	2313	1402.8	1782.34
aten_s0172.g60		2885	2312	1402.19	1781.57
aten_s0008.g78	serine/arginine repetitive matrix protein 1-like isoform X1	5431	2302	1396.13	1773.86
aten_s0043.g7	retina and anterior neural fold homeobox protein 2-like isoform X2	6045	2290	1388.85	1764.61
aten_s0001.g7	serine/arginine repetitive matrix protein 2-like isoform X1	4111	2288	1387.64	1763.07
aten_s0163.g13	heterogeneous nuclear ribonucleoprotein A3-like	2343	2278	1381.57	1755.37
aten_s0035.g113	LOW QUALITY PROTEIN: ankyrin repeat domain-containing protein 27-like	4405	2274	1379.14	1752.28
aten_s0005.g190	E3 SUMO-protein ligase RanBP2-like	10839	2272	1377.93	1750.74
aten_s0015.g70	calcium/calmodulin-dependent protein kinase type II subunit alpha-like	2350	2270	1376.72	1749.2
aten_s0575.g3		3319	2269	1376.11	1748.43
aten_s0041.g70		1475	2269	1376.11	1748.43
aten_s0043.g71	splicing factor 3B subunit 2-like	3638	2262	1371.87	1743.04
aten_s0204.g31	slit homolog 3 protein-like isoform X1	2940	2258	1369.44	1739.96
aten_s0286.g6	protein mono-ADP-ribosyltransferase PARP12-like isoform X1	2668	2256	1368.23	1738.41
aten_s0128.g40	multidrug resistance-associated protein 1-like	4944	2255	1367.62	1737.64
aten_s0062.g120	ATP-dependent RNA helicase DDX51-like	2172	2255	1367.62	1737.64
aten_s0005.g251	rho guanine nucleotide exchange factor 7-like isoform X3	5336	2254	1367.01	1736.87
aten_s0148.g10		1525	2253	1366.41	1736.1
aten_s0093.g6	high mobility group protein 20A-like isoform X1	2721	2248	1363.38	1732.25
aten_s0409.g12		4720	2247	1362.77	1731.48
aten_s0024.g26	golgin subfamily B member 1-like isoform X3	16127	2246	1362.16	1730.71
aten_s0059.g42	dynein heavy chain 5, axonemal-like	7749	2242	1359.74	1727.63
aten_s0105.g14	myosin heavy chain-like isoform X2	1724	2234	1354.88	1721.46
aten_s0036.g65	follistatin-related protein 4-like	1683	2234	1354.88	1721.46
aten_s0045.g56		1524	2232	1353.67	1719.92
aten_s0085.g17	medium-chain specific acyl-CoA dehydrogenase, mitochondrial-like	1968	2228	1351.25	1716.84
aten_s0330.g13	trichohyalin-like	2374	2226	1350.03	1715.3
aten_s0133.g21	bifunctional arginine demethylase and lysyl-hydroxylase JMJD6-like	1681	2226	1350.03	1715.3
aten_s0084.g31	claudin domain-containing protein 2-like isoform X1	1844	2224	1348.82	1713.76
aten_s0184.g1	transmembrane protease serine 9-like isoform X1	5475	2218	1345.18	1709.13
aten_s0044.g10	macrophage scavenger receptor types I and II-like	1645	2218	1345.18	1709.13
aten_s0583.g2		934	2216	1343.97	1707.59
aten_s0088.g18	cyclic nucleotide-gated channel rod photoreceptor subunit alpha-like	6324	2216	1343.97	1707.59
aten_s0035.g111	E3 ubiquitin-protein ligase TRIM71-like	3845	2214	1342.76	1706.05
aten_s0005.g298		5859	2214	1342.76	1706.05
aten_s0017.g133	nucleolar complex protein 2 homolog	2843	2208	1339.12	1701.43
aten_s0038.g3	zinc finger protein 862-like	2612	2206	1337.9	1699.89
aten_s0085.g37	F-actin-methionine sulfoxide oxidase mical1-like, partial	8359	2201	1334.87	1696.03
aten_s0261.g21	fasciculation and elongation protein zeta-2-like	2512	2200	1334.26	1695.26
aten_s0068.g74	calumenin-B-like isoform X1	1395	2198	1333.05	1693.72
aten_s0030.g38	leucine-rich repeat extensin-like protein 3	1428	2196	1331.84	1692.18
aten_s0025.g92	protein polybromo-1-like	5924	2193	1330.02	1689.87
aten_s0012.g133	probable palmitoyltransferase ZDHHC14	2156	2187	1326.38	1685.25
aten_s0013.g11	28 kDa heat- and acid-stable phosphoprotein-like	1540	2186	1325.77	1684.47
aten_s0162.g26		3471	2184	1324.56	1682.93
aten_s0261.g17	monocarboxylate transporter 3-like	1515	2182	1323.35	1681.39
aten_s0075.g106	zinc finger protein 862-like	2000	2182	1323.35	1681.39
aten_s0010.g167	transient receptor potential cation channel subfamily V member 5-like isoform X1	4152	2182	1323.35	1681.39
aten_s0301.g17		1443	2180	1322.13	1679.85
aten_s0098.g3	DNA primase small subunit-like isoform X1	1954	2178	1320.92	1678.31
aten_s0094.g39	KICSTOR complex protein ITFG2-like isoform X1	3049	2176	1319.71	1676.77
aten_s0047.g108	sodium/calcium exchanger NCL1-like	3955	2169	1315.46	1671.37
aten_s0600.g1		6463	2168	1314.86	1670.6
aten_s0013.g172	thymidine kinase, cytosolic-like	2327	2168	1314.86	1670.6
aten_s0210.g13	LETM1 domain-containing protein 1-like, partial	2026	2166	1313.64	1669.06
aten_s0035.g61	N-acetylglucosamine-1-phosphodiester alpha-N-acetylglucosaminidase-like	1907	2164	1312.43	1667.52
aten_s0183.g16	E3 ubiquitin-protein ligase MARCH6-like	3701	2162	1311.22	1665.98
aten_s0212.g13	BAI1-associated protein 3-like isoform X1	5634	2160	1310.01	1664.44
aten_s0014.g48		656	2159	1309.4	1663.67
aten_s0114.g19	neuropilin-2-like	2793	2156	1307.58	1661.36
aten_s0172.g38	poly(U)-binding-splicing factor PUF60-like isoform X1	2649	2155	1306.97	1660.59
aten_s0017.g155	rootletin-like isoform X1	3686	2154	1306.37	1659.82
aten_s0097.g50		1674	2148	1302.73	1655.19
aten_s0011.g175	ADP-ribosylation factor 4	1902	2148	1302.73	1655.19
aten_s0113.g29	ATP-dependent RNA helicase DDX3X-like	3906	2140	1297.88	1649.03
aten_s0048.g69	protein LSM14 homolog A-A-like	2355	2140	1297.88	1649.03
aten_s0003.g178	dynamin-like 120 kDa protein, mitochondrial isoform X1	4075	2139	1297.27	1648.26
aten_s0117.g37	transient receptor potential cation channel subfamily M member 2-like	6196	2138	1296.66	1647.49
aten_s0009.g43	H/ACA ribonucleoprotein complex subunit CBF5-like	2027	2134	1294.24	1644.4
aten_s0018.g86		2787	2133	1293.63	1643.63
aten_s0033.g92		1565	2131	1292.42	1642.09
aten_s0068.g53	elongation of very long chain fatty acids protein 4-like isoform X2	1952	2124	1288.17	1636.7
aten_s0145.g22	replication factor C subunit 1-like	3350	2123	1287.57	1635.93
aten_s0450.g3	E3 SUMO-protein ligase KIAA1586-like	1934	2122	1286.96	1635.16
aten_s0005.g39	UDP-xylose and UDP-N-acetylglucosamine transporter-like	2975	2122	1286.96	1635.16
aten_s0164.g26	kinesin-like protein KIF16B isoform X2	6075	2121	1286.35	1634.39
aten_s0047.g2		7734	2119	1285.14	1632.85
aten_s0057.g39		4492	2118	1284.53	1632.08
aten_s0030.g72		3989	2116	1283.32	1630.53
aten_s0003.g270		1655	2116	1283.32	1630.53
aten_s0297.g16	eukaryotic translation initiation factor 5B-like isoform X1	5430	2107	1277.86	1623.6
aten_s0159.g21	52 kDa repressor of the inhibitor of the protein kinase-like	2434	2104	1276.04	1621.29
aten_s0137.g33	LOW QUALITY PROTEIN: N-sulphoglucosamine sulphohydrolase-like	2650	2103	1275.44	1620.52
aten_s0271.g6		1172	2100	1273.62	1618.21
aten_s0303.g5	polycystic kidney disease 2-like 1 protein	3881	2096	1271.19	1615.12
aten_s0143.g23	proteoglycan 4-like isoform X3	4454	2096	1271.19	1615.12
aten_s0181.g41	synaptic functional regulator FMR1-like isoform X1	1822	2092	1268.76	1612.04
aten_s0055.g87	1-phosphatidylinositol 3-phosphate 5-kinase-like isoform X1	9081	2091	1268.16	1611.27
aten_s0001.g158	F-box only protein 22-like	3154	2089	1266.94	1609.73
aten_s0120.g29	probable ATP-dependent RNA helicase DDX59	2065	2086	1265.13	1607.42
aten_s0017.g36	forkhead box protein J3-like	2775	2080	1261.49	1602.79
aten_s0036.g88		27485	2080	1261.49	1602.79
aten_s0038.g37	leucine-rich repeat serine/threonine-protein kinase 2-like	7955	2078	1260.27	1601.25
aten_s0318.g1		3554	2074	1257.85	1598.17
aten_s0176.g13		6711	2072	1256.63	1596.63
aten_s0324.g24	MAP7 domain-containing protein 2-like	4377	2072	1256.63	1596.63
aten_s0007.g159	polypeptide N-acetylgalactosaminyltransferase 13-like	3151	2071	1256.03	1595.86
aten_s0125.g58		5744	2068	1254.21	1593.55
aten_s0018.g15	translocation protein SEC63 homolog	3049	2063	1251.18	1589.69
aten_s0001.g155	protein spinster homolog 1-like isoform X1	2340	2062	1250.57	1588.92
aten_s0070.g12	DDB1- and CUL4-associated factor 4-like protein 2	3226	2056	1246.93	1584.3
aten_s0113.g2	hydrocephalus-inducing protein homolog	15711	2051	1243.9	1580.45
aten_s0026.g34	CUB domain-containing protein	1998	2051	1243.9	1580.45
aten_s0025.g76	THO complex subunit 2-like	5370	2043	1239.05	1574.28
aten_s0191.g11		1931	2042	1238.44	1573.51
aten_s0127.g2	protocadherin Fat 4-like	9932	2040	1237.23	1571.97
aten_s0451.g6	U7 snRNA-associated Sm-like protein LSm11.*Homo sapiens OX=9606 GN=LSM11 PE=1 SV=2	4372	2032	1232.38	1565.81
aten_s0002.g114	transient receptor potential cation channel subfamily A member 1-like	4429	2032	1232.38	1565.81
aten_s0784.g2	piggyBac transposable element-derived protein 4-like	724	2031	1231.77	1565.04
aten_s0247.g30	trichohyalin-like isoform X1	5495	2027	1229.34	1561.95
aten_s0067.g35	tubulin beta chain-like	699	2024	1227.52	1559.64
aten_s0003.g108	cyclin-dependent kinase 11B-like isoform X1	5068	2024	1227.52	1559.64
aten_s0004.g117		4401	2023	1226.92	1558.87
aten_s0115.g13	early lactation protein-like	798	2021	1225.7	1557.33
aten_s0261.g7		3127	2016	1222.67	1553.48
aten_s0122.g2		3019	2015	1222.07	1552.71
aten_s0074.g5	chloride channel CLIC-like protein 1	1865	2014	1221.46	1551.94
aten_s0146.g9		1168	2014	1221.46	1551.94
aten_s0244.g7	AT-rich interactive domain-containing protein 1A-like	6927	2010	1219.03	1548.85
aten_s0031.g18	A-kinase anchor protein 9-like isoform X2	19019	2010	1219.03	1548.85
aten_s0035.g85	lon protease homolog 2, peroxisomal-like	2964	2010	1219.03	1548.85
aten_s0207.g23	DEAD-box ATP-dependent RNA helicase 37-like	4282	2008	1217.82	1547.31
aten_s0013.g33	dynein heavy chain 3, axonemal-like	10462	2005	1216	1545
aten_s0079.g89	trichohyalin-like isoform X4	6886	1999	1212.36	1540.38
aten_s0046.g16	alpha-dioxygenase 2-like	1183	1998	1211.75	1539.61
aten_s0094.g15	long-chain-fatty-acid--CoA ligase 1-like isoform X1	3315	1996	1210.54	1538.07
aten_s0111.g34		11038	1996	1210.54	1538.07
aten_s0030.g125	probable protein disulfide-isomerase A4	4538	1996	1210.54	1538.07
aten_s0115.g6	barH-like 2 homeobox protein	1741	1990	1206.9	1533.44
aten_s0039.g37	eukaryotic translation initiation factor 3 subunit A-like	5604	1988	1205.69	1531.9
aten_s0846.g1		3091	1987	1205.08	1531.13
aten_s0117.g58	heat shock protein 60A-like	2294	1987	1205.08	1531.13
aten_s0001.g333	mitogen-activated protein kinase 1-like	4175	1984	1203.26	1528.82
aten_s0085.g9	actophorin-like	673	1980	1200.84	1525.74
aten_s0057.g44		2199	1976	1198.41	1522.65
aten_s0156.g6	ubiquitin carboxyl-terminal hydrolase 46-like	2631	1975	1197.81	1521.88
aten_s0289.g6	metabotropic glutamate receptor 3-like isoform X1	4827	1974	1197.2	1521.11
aten_s0141.g17	dynein heavy chain 6, axonemal-like	15592	1974	1197.2	1521.11
aten_s0032.g55	ras GTPase-activating protein 1-like isoform X1	3539	1970	1194.77	1518.03
aten_s0034.g45	gem-associated protein 5-like isoform X2	5244	1968	1193.56	1516.49
aten_s0025.g64	MAM and LDL-receptor class A domain-containing protein 2-like isoform X1	7824	1968	1193.56	1516.49
aten_s0028.g81	dnaJ homolog subfamily C member 13-like	7947	1968	1193.56	1516.49
aten_s0023.g65	protein argonaute-2-like	4757	1966	1192.35	1514.95
aten_s0204.g26		2374	1964	1191.13	1513.41
aten_s0359.g10	zinc finger CCHC domain-containing protein 8-like	3612	1961	1189.31	1511.1
aten_s0095.g2	protein ALP1-like	1556	1959	1188.1	1509.55
aten_s0482.g4	solute carrier family 12 member 4-like	4058	1959	1188.1	1509.55
aten_s0037.g4		1541	1957	1186.89	1508.01
aten_s0028.g52	serine/threonine-protein kinase MRCK alpha-like isoform X4	6581	1956	1186.28	1507.24
aten_s1231.g1	tetratricopeptide repeat protein 14-like isoform X3	1573	1955	1185.68	1506.47
aten_s0130.g26	titin-like isoform X1	35611	1952	1183.86	1504.16
aten_s0067.g147	centromere protein F-like	13749	1948	1181.43	1501.08
aten_s0357.g6		9427	1946	1180.22	1499.54
aten_s0010.g172	protein very KIND-like	11240	1944	1179	1498
aten_s0105.g8	peptidyl-prolyl cis-trans isomerase B-like	1080	1940	1176.58	1494.91
aten_s0004.g110		1402	1939	1175.97	1494.14
aten_s0177.g3	cohesin subunit SA-1-like	3506	1937	1174.76	1492.6
aten_s0075.g48	metabotropic glutamate receptor 3-like	6476	1930	1170.51	1487.21
aten_s0068.g33	RNA polymerase-associated protein CTR9 homolog	4927	1928	1169.3	1485.67
aten_s0014.g135	tetratricopeptide repeat protein 28-like	2099	1926	1168.09	1484.13
aten_s0143.g5	serine/arginine repetitive matrix protein 2-like	4106	1924	1166.87	1482.58
aten_s0012.g121	biotin--protein ligase-like isoform X2	2090	1924	1166.87	1482.58
aten_s0010.g144	nucleolar protein 56-like	2415	1924	1166.87	1482.58
aten_s0014.g108	acidic leucine-rich nuclear phosphoprotein 32 family member B-like	620	1921	1165.06	1480.27
aten_s0093.g28	ras-related protein Rab-21-like	1271	1920	1164.45	1479.5
aten_s0036.g32	nuclear speckle splicing regulatory protein 1-like	1634	1918	1163.24	1477.96
aten_s0208.g44	glutamine-rich protein 2-like isoform X5	2858	1914	1160.81	1474.88
aten_s0060.g49		3362	1913	1160.2	1474.11
aten_s0137.g47		3567	1904	1154.75	1467.17
aten_s0299.g26	dynein assembly factor 3, axonemal-like	1888	1896	1149.89	1461.01
aten_s0372.g11	E3 ubiquitin-protein ligase TTC3-like isoform X5	5811	1894	1148.68	1459.47
aten_s0130.g29	bromodomain adjacent to zinc finger domain protein 2B-like	2751	1892	1147.47	1457.93
aten_s0162.g29		4254	1891	1146.86	1457.16
aten_s0194.g21	zinc finger protein 2-like	3313	1890	1146.25	1456.38
aten_s0202.g31	synapsin-2-like isoform X2	2468	1890	1146.25	1456.38
aten_s0010.g62	myoferlin-like isoform X2	6012	1890	1146.25	1456.38
aten_s0412.g7		3073	1888	1145.04	1454.84
aten_s0136.g28	Bardet-Biedl syndrome 7 protein homolog	3376	1888	1145.04	1454.84
aten_s0168.g36	inositol phosphorylceramide synthase catalytic subunit aur1-like	2030	1888	1145.04	1454.84
aten_s0047.g54	ras-related protein Rab-34-like	2342	1887	1144.44	1454.07
aten_s0045.g7	papilin-like	5883	1885	1143.22	1452.53
aten_s0328.g8	TNF receptor-associated factor 6-like	1977	1884	1142.62	1451.76
aten_s0025.g19	calnexin-like	4008	1884	1142.62	1451.76
aten_s1343.g1		1636	1883	1142.01	1450.99
aten_s0035.g42	ras-related protein Rab-30-like	1139	1882	1141.4	1450.22
aten_s0110.g23	RNA polymerase I-specific transcription initiation factor RRN3-like	3139	1880	1140.19	1448.68
aten_s0027.g88	collagen alpha-3(IV) chain-like	7362	1878	1138.98	1447.14
aten_s0232.g28		2760	1876	1137.76	1445.6
aten_s0015.g22	LOW QUALITY PROTEIN: ral GTPase-activating protein subunit alpha-2-like	6596	1870	1134.12	1440.97
aten_s0121.g46	scaffold attachment factor B1-like	6225	1866	1131.7	1437.89
aten_s0138.g28	polycystic kidney disease protein 1-like 2	12915	1862	1129.27	1434.81
aten_s0008.g94	dnaJ homolog subfamily A member 1-like	2519	1862	1129.27	1434.81
aten_s0013.g86	disintegrin and metalloproteinase domain-containing protein 12-like	4397	1858	1126.85	1431.73
aten_s0046.g161	mediator of DNA damage checkpoint protein 1-like isoform X1	5044	1857	1126.24	1430.96
aten_s0001.g208	dynein heavy chain 10, axonemal-like isoform X1	14303	1857	1126.24	1430.96
aten_s0046.g18	neurofilament heavy polypeptide-like	2623	1856	1125.63	1430.19
aten_s0050.g42		3767	1856	1125.63	1430.19
aten_s0062.g100	serine/threonine-protein phosphatase 2A regulatory subunit B'' subunit beta-like	3128	1856	1125.63	1430.19
aten_s0010.g189	protein DD3-3-like	3086	1852	1123.21	1427.1
aten_s0002.g235	BTB/POZ domain-containing protein 6-like	2657	1850	1122	1425.56
aten_s0036.g118	Basic immunoglobulin-like variable motif-containing protein.*Xenopus tropicalis OX=8364 GN=bivm PE=2 SV=1	3089	1846	1119.57	1422.48
aten_s0313.g18	aconitate hydratase, mitochondrial-like	2877	1845	1118.96	1421.71
aten_s0028.g150		1108	1843	1117.75	1420.17
aten_s0031.g30	vacuolar protein sorting-associated protein 13C-like isoform X2	11246	1840	1115.93	1417.86
aten_s0001.g64	LOW QUALITY PROTEIN: protocadherin Fat 4-like	8271	1840	1115.93	1417.86
aten_s0009.g80	propionyl-CoA carboxylase alpha chain, mitochondrial-like	2629	1836	1113.5	1414.77
aten_s0026.g85	RUN and FYVE domain-containing protein 2-like	2315	1834	1112.29	1413.23
aten_s0181.g29	pleckstrin homology-like domain family B member 1 isoform X1	5703	1830	1109.87	1410.15
aten_s0277.g14	collagen alpha-1(I) chain-like isoform X18	3706	1828	1108.65	1408.61
aten_s0074.g71		1525	1828	1108.65	1408.61
aten_s0056.g89	VWFA and cache domain-containing protein 1-like	4168	1828	1108.65	1408.61
aten_s0122.g21	LOW QUALITY PROTEIN: splicing factor 3B subunit 3-like	4036	1826	1107.44	1407.07
aten_s0037.g20	sodium-dependent neutral amino acid transporter B(0)AT3-like isoform X1	3539	1820	1103.8	1402.44
aten_s0001.g58		35401	1820	1103.8	1402.44
aten_s0189.g22	allograft inflammatory factor 1-like	1005	1819	1103.19	1401.67
aten_s0190.g36		2001	1818	1102.59	1400.9
aten_s0107.g40		17545	1816	1101.37	1399.36
aten_s0090.g16		6764	1815	1100.77	1398.59
aten_s0091.g69	probable serine incorporator	2316	1814	1100.16	1397.82
aten_s0035.g89	RNA-binding protein 39-like isoform X1	2447	1814	1100.16	1397.82
aten_s0062.g111	piggyBac transposable element-derived protein 4-like isoform X1	3194	1813	1099.56	1397.05
aten_s0006.g209		1586	1812	1098.95	1396.28
aten_s0084.g70	tectonic-3-like	2532	1811	1098.34	1395.51
aten_s0058.g127	BAG family molecular chaperone regulator 3-like	3302	1811	1098.34	1395.51
aten_s0342.g9	XK-related protein 4-like	6869	1810	1097.74	1394.74
aten_s0136.g13		1636	1808	1096.52	1393.2
aten_s0192.g24	elongation factor 1-delta-like	748	1806	1095.31	1391.66
aten_s0139.g44	serine/arginine repetitive matrix protein 2-like	7126	1804	1094.1	1390.12
aten_s0077.g18	hemicentin-2-like	2641	1802	1092.88	1388.57
aten_s0229.g25	homeobox protein 5-like	2407	1802	1092.88	1388.57
aten_s0047.g72		609	1794	1088.03	1382.41
aten_s0153.g42	cytosolic carboxypeptidase-like protein 5 isoform X1	4846	1793	1087.43	1381.64
aten_s0309.g3	52 kDa repressor of the inhibitor of the protein kinase-like	7141	1790	1085.61	1379.33
aten_s0080.g21	UPF0746 protein DDB_G0281095-like	2499	1790	1085.61	1379.33
aten_s0053.g2	dynein heavy chain 12, axonemal-like	12690	1788	1084.39	1377.79
aten_s0063.g9	proliferation marker protein Ki-67-like isoform X1	6290	1788	1084.39	1377.79
aten_s0082.g42	probable ATP-dependent RNA helicase DDX23	2865	1788	1084.39	1377.79
aten_s0142.g15		3039	1786	1083.18	1376.24
aten_s0194.g7		4283	1785	1082.57	1375.47
aten_s0009.g127	otoferlin-like isoform X5	7134	1785	1082.57	1375.47
aten_s0113.g38	F-box-like/WD repeat-containing protein TBL1XR1	3863	1780	1079.54	1371.62
aten_s0035.g148	protein MB21D2-like	3592	1778	1078.33	1370.08
aten_s0046.g122	transcription initiation factor TFIID subunit 2-like isoform X1	4055	1776	1077.12	1368.54
aten_s0146.g17		475	1773	1075.3	1366.23
aten_s0471.g6	allantoicase-like	1672	1772	1074.69	1365.46
aten_s0165.g33	cGMP-inhibited 3',5'-cyclic phosphodiesterase A-like	5467	1771	1074.08	1364.69
aten_s0373.g2	A disintegrin and metalloproteinase with thrombospondin motifs 16-like	3984	1764	1069.84	1359.29
aten_s0372.g5	protein sel-1 homolog 3-like	6954	1764	1069.84	1359.29
aten_s0010.g36	attractin-like protein 1	6269	1764	1069.84	1359.29
aten_s0097.g34	EH domain-binding protein 1-like	4327	1763	1069.23	1358.52
aten_s0179.g11	transformer-2 protein homolog alpha-like isoform X3	3599	1760	1067.41	1356.21
aten_s0086.g11	glutamic acid-rich protein-like	3433	1756	1064.99	1353.13
aten_s0663.g4	ATP-binding cassette sub-family A member 3-like isoform X1	3949	1754	1063.77	1351.59
aten_s0259.g10		1407	1753	1063.17	1350.82
aten_s0010.g53	substance-K receptor-like	2772	1752	1062.56	1350.05
aten_s0154.g34	transcription factor IIIB 90 kDa subunit-like isoform X3	2847	1750	1061.35	1348.5
aten_s0042.g69		4840	1750	1061.35	1348.5
aten_s0053.g3	tyrosine-protein kinase SRK2-like isoform X1	3212	1748	1060.13	1346.96
aten_s0007.g24	receptor-type tyrosine-protein phosphatase F-like isoform X3	8374	1748	1060.13	1346.96
aten_s0023.g8	F-box only protein 11-like isoform X1	3317	1744	1057.71	1343.88
aten_s0018.g66	E3 ubiquitin-protein ligase arih1-like	1682	1744	1057.71	1343.88
aten_s0005.g163	coiled-coil domain-containing protein 39-like	3209	1736	1052.86	1337.72
aten_s0013.g188	LOW QUALITY PROTEIN: meiosis regulator and mRNA stability factor 1-like	7577	1736	1052.86	1337.72
aten_s0054.g28	cadherin-23-like isoform X2	11490	1730	1049.22	1333.09
aten_s0210.g31	F-box only protein 11-like isoform X2	516	1728	1048	1331.55
aten_s0077.g24	neurogenic locus notch homolog protein 1-like	3946	1726	1046.79	1330.01
aten_s0156.g33	nucleolar protein 8-like	3576	1722	1044.37	1326.93
aten_s0197.g50	nuclear export mediator factor NEMF-like	3488	1721	1043.76	1326.16
aten_s0061.g4		4046	1718	1041.94	1323.85
aten_s0154.g28	polycystin-1-like	12165	1717	1041.33	1323.08
aten_s0077.g42	glutamate-rich protein 3-like isoform X1	4903	1717	1041.33	1323.08
aten_s0133.g29	ATP-binding cassette sub-family A member 3-like isoform X1	4961	1715	1040.12	1321.53
aten_s0088.g73	BEN domain-containing protein 4.*Homo sapiens OX=9606 GN=BEND4 PE=2 SV=3	1100	1712	1038.3	1319.22
aten_s0006.g18		9041	1711	1037.69	1318.45
aten_s0004.g23	inner centromere protein-like	3137	1710	1037.09	1317.68
aten_s0009.g243	dentin sialophosphoprotein-like	14081	1709	1036.48	1316.91
aten_s0453.g6	cyclin-dependent kinase 11B-like isoform X2	5233	1708	1035.87	1316.14
aten_s0441.g1	ATP-binding cassette sub-family A member 3-like isoform X1	1489	1704	1033.45	1313.06
aten_s0022.g66	neogenin-like	8321	1704	1033.45	1313.06
aten_s0003.g47	transcriptional regulator ATRX-like	3971	1703	1032.84	1312.29
aten_s0156.g17	protection of telomeres protein 1-like	4289	1702	1032.24	1311.52
aten_s0581.g2		5685	1701	1031.63	1310.75
aten_s0164.g42	LOW QUALITY PROTEIN: protein NLRC3-like	3233	1699	1030.42	1309.2
aten_s0012.g171		2862	1698	1029.81	1308.43
aten_s0106.g66	DNA repair protein complementing XP-A cells homolog isoform X1	955	1691	1025.56	1303.04
aten_s0207.g30	potassium voltage-gated channel subfamily C member 1-like isoform X2	3737	1690	1024.96	1302.27
aten_s0292.g29	LOW QUALITY PROTEIN: CREB-binding protein-like	944	1688	1023.74	1300.73
aten_s0021.g123		1817	1686	1022.53	1299.19
aten_s0105.g5	serine/threonine-protein kinase Nek4-like isoform X2	2621	1684	1021.32	1297.65
aten_s0227.g14		2838	1684	1021.32	1297.65
aten_s0015.g180	protein DEFECTIVE IN EXINE FORMATION 1-like	3017	1684	1021.32	1297.65
aten_s0028.g14	trichohyalin-like	2132	1682	1020.11	1296.11
aten_s0034.g153	probable RNA-binding protein 19	4132	1682	1020.11	1296.11
aten_s0323.g6		2957	1677	1017.07	1292.25
aten_s0242.g3	ribosomal protein S6 kinase 2 alpha-like isoform X1	2447	1676	1016.47	1291.48
aten_s0011.g3	cytochrome P450 3A29-like	2958	1672	1014.04	1288.4
aten_s0183.g7		4834	1670	1012.83	1286.86
aten_s0004.g183	Hermansky-Pudlak syndrome 5 protein homolog	5072	1668	1011.62	1285.32
aten_s0067.g128	ras-related protein Rab-24-like isoform X1	3599	1667	1011.01	1284.55
aten_s0062.g49	E3 ubiquitin-protein ligase DZIP3-like isoform X1	2321	1666	1010.4	1283.78
aten_s0034.g61		5190	1666	1010.4	1283.78
aten_s0326.g14	protein PRRC2C-like	10592	1654	1003.12	1274.53
aten_s0055.g23	thioredoxin domain-containing protein 3 homolog isoform X1	3874	1654	1003.12	1274.53
aten_s0003.g48	YEATS domain-containing protein 4-like	2214	1654	1003.12	1274.53
aten_s0045.g30	thyroid receptor-interacting protein 11-like isoform X2	7459	1652	1001.91	1272.99
aten_s0237.g15	histone H2B-like	1359	1650	1000.7	1271.45
aten_s0071.g27		912	1650	1000.7	1271.45
aten_s0033.g101	coiled-coil domain-containing protein 112-like isoform X1	1601	1649	1000.09	1270.68
aten_s0239.g9	Retrovirus-related Pol polyprotein from transposon TNT 1-94.*Nicotiana tabacum OX=4097 PE=2 SV=1	2276	1644	997.059	1266.82
aten_s0075.g40	very long-chain specific acyl-CoA dehydrogenase, mitochondrial-like	3685	1644	997.059	1266.82
aten_s0027.g89	collagen alpha-1(IV) chain-like	5547	1644	997.059	1266.82
aten_s0107.g55		3375	1642	995.847	1265.28
aten_s0285.g14	von Willebrand factor A domain-containing protein 7-like isoform X1	1367	1641	995.24	1264.51
aten_s0058.g108	general vesicular transport factor p115-like	4489	1640	994.634	1263.74
aten_s0197.g44	E3 SUMO-protein ligase SIZ2-like	3257	1636	992.208	1260.66
aten_s0241.g45	apoptotic chromatin condensation inducer in the nucleus-like	3000	1636	992.208	1260.66
aten_s0098.g27	importin subunit beta-1-like isoform X1	3490	1634	990.995	1259.12
aten_s0102.g33		2033	1634	990.995	1259.12
aten_s0049.g83	centrosomal protein of 290 kDa-like	15355	1634	990.995	1259.12
aten_s0360.g5	lethal(2) giant larvae protein homolog 2-like isoform X2	4382	1630	988.569	1256.04
aten_s0022.g19		4309	1630	988.569	1256.04
aten_s0165.g19		3437	1630	988.569	1256.04
aten_s0058.g1		8050	1629	987.962	1255.26
aten_s0007.g203	G patch domain-containing protein 4-like	1492	1625	985.536	1252.18
aten_s0006.g190	GRAM domain-containing protein 4-like	2107	1624	984.93	1251.41
aten_s0042.g77	STE20-like serine/threonine-protein kinase	5617	1622	983.717	1249.87
aten_s0142.g20	unconventional myosin-X-like	7038	1616	980.078	1245.25
aten_s0009.g192	aflatoxin B1 aldehyde reductase member 3-like	1575	1614	978.865	1243.71
aten_s0042.g114	calponin homology domain-containing protein DDB_G0272472-like	5178	1611	977.046	1241.39
aten_s0547.g2	nucleotide-binding oligomerization domain-containing protein 1-like isoform X4	7353	1610	976.439	1240.62
aten_s0089.g8	TBC1 domain family member 15-like	3032	1607	974.62	1238.31
aten_s0010.g155	protein starmaker-like	1210	1606	974.013	1237.54
aten_s0041.g57	galanin receptor type 1-like	1412	1604	972.8	1236
aten_s0029.g94	A-kinase anchor protein 17A-like	2029	1603	972.194	1235.23
aten_s0069.g62	radial spoke head protein 4 homolog A-like isoform X5	2016	1602	971.587	1234.46
aten_s0327.g5	60S ribosomal protein L3-like	1520	1600	970.374	1232.92
aten_s0021.g8	tricarboxylate transport protein, mitochondrial-like	1548	1600	970.374	1232.92
aten_s0027.g99	U2 snRNP-associated SURP motif-containing protein-like	3751	1599	969.768	1232.15
aten_s0042.g135	phenylalanine-4-hydroxylase-like isoform X1	1853	1598	969.161	1231.38
aten_s0099.g73	LOW QUALITY PROTEIN: von Willebrand factor A domain-containing protein 3B-like	6347	1597	968.555	1230.61
aten_s0163.g47	anaphase-promoting complex subunit 2-like	3959	1594	966.735	1228.29
aten_s0106.g23	40S ribosomal protein S6-like	1009	1592	965.522	1226.75
aten_s0029.g178		7451	1592	965.522	1226.75
aten_s0104.g41	tetratricopeptide repeat protein 28-like	4447	1588	963.096	1223.67
aten_s0025.g82	transcription initiation factor TFIID subunit 1-like isoform X1	6483	1587	962.49	1222.9
aten_s0089.g53	ras-related protein Rab-27A-like isoform X2	2594	1581	958.851	1218.28
aten_s0124.g10	sepiapterin reductase-like isoform X1	1602	1580	958.245	1217.51
aten_s0076.g63	ankyrin repeat domain-containing protein 26-like isoform X5	6359	1577	956.425	1215.19
aten_s0005.g290	coiled-coil domain-containing protein 153-like	1343	1577	956.425	1215.19
aten_s0371.g15	UDP-glucuronic acid decarboxylase 1-like	2107	1576	955.819	1214.42
aten_s0070.g27	carbohydrate sulfotransferase 5-like	1280	1572	953.393	1211.34
aten_s0191.g6		1244	1571	952.786	1210.57
aten_s0003.g96	protein SFI1 homolog	7906	1570	952.18	1209.8
aten_s0049.g153	U5 small nuclear ribonucleoprotein 40 kDa protein-like	1890	1570	952.18	1209.8
aten_s0180.g6	pleckstrin homology domain-containing family H member 1-like isoform X1	5633	1569	951.573	1209.03
aten_s0275.g15	ras-related protein Rab-38-like isoform X2	1700	1566	949.754	1206.72
aten_s0055.g44	cyclin-dependent kinase 14-like isoform X1	5952	1566	949.754	1206.72
aten_s0027.g10		8860	1565	949.147	1205.95
aten_s0401.g1		8934	1563	947.934	1204.41
aten_s0080.g35	transcription initiation factor TFIID subunit 4-like	3968	1562	947.328	1203.64
aten_s0152.g33	limbic system-associated membrane protein-like isoform X1	1919	1561	946.721	1202.87
aten_s0204.g34		2054	1561	946.721	1202.87
aten_s0115.g53	myelin-associated glycoprotein-like	2979	1560	946.115	1202.1
aten_s0015.g114	Golgi resident protein GCP60-like	3046	1557	944.295	1199.78
aten_s0232.g21		3485	1556	943.689	1199.01
aten_s0167.g9		3719	1555	943.082	1198.24
aten_s0088.g17	SAP30-binding protein-like isoform X3	1463	1554	942.476	1197.47
aten_s0058.g75	proteasome inhibitor PI31 subunit-like	1527	1554	942.476	1197.47
aten_s0340.g11	protein NLRC3-like	6809	1552	941.263	1195.93
aten_s0023.g35	succinate dehydrogenase	3170	1552	941.263	1195.93
aten_s0214.g5	protein Mis18-alpha-like	1187	1545	937.018	1190.54
aten_s0314.g3		1592	1542	935.198	1188.22
aten_s0079.g95	ectonucleotide pyrophosphatase/phosphodiesterase family member 5-like	3283	1540	933.985	1186.68
aten_s0001.g338	vacuole membrane protein 1-like	2668	1539	933.379	1185.91
aten_s0050.g6		9722	1538	932.772	1185.14
aten_s0096.g77	polyglutamine-binding protein 1-like	1857	1538	932.772	1185.14
aten_s0167.g15		19974	1536	931.559	1183.6
aten_s0055.g59	solute carrier family 15 member 2-like	4360	1535	930.953	1182.83
aten_s0039.g19	metalloproteinase inhibitor 3-like	2992	1534	930.346	1182.06
aten_s0061.g28	LOW QUALITY PROTEIN: von Willebrand factor A domain-containing protein 7-like	4126	1532	929.133	1180.52
aten_s0102.g27	nipped-B-like protein isoform X2	8437	1531	928.527	1179.75
aten_s0255.g7	dimethlysulfonioproprionate lyase 7-like	1671	1530	927.92	1178.98
aten_s0195.g14	histone H2B-like	829	1528	926.707	1177.44
aten_s0138.g18	radial spoke head protein 4 homolog A-like	3112	1524	924.281	1174.35
aten_s0015.g30	claspin-like	4223	1523	923.675	1173.58
aten_s0115.g56	hemicentin-1-like	6265	1520	921.855	1171.27
aten_s0642.g2	skin secretory protein xP2-like	3171	1518	920.643	1169.73
aten_s0126.g12	tetratricopeptide repeat protein 28-like	1733	1518	920.643	1169.73
aten_s0005.g158	DNA-directed RNA polymerase II subunit RPB1.*Homo sapiens OX=9606 GN=POLR2A PE=1 SV=2	805	1518	920.643	1169.73
aten_s0007.g124	protein canopy homolog 2-like	1941	1517	920.036	1168.96
aten_s0044.g107	CUB and sushi domain-containing protein 3-like	4252	1515	918.823	1167.42
aten_s0110.g48	dynein regulatory complex protein 10-like	3016	1513	917.61	1165.88
aten_s0292.g7	E3 ubiquitin-protein ligase TRIM56-like	4101	1512	917.004	1165.11
aten_s0043.g32	vasodilator-stimulated phosphoprotein-like	4270	1512	917.004	1165.11
aten_s0644.g8	cytoplasmic tRNA 2-thiolation protein 2-like	3050	1510	915.791	1163.57
aten_s0276.g3		1679	1509	915.184	1162.8
aten_s0052.g24	RNA polymerase II-associated factor 1 homolog isoform X1	2289	1509	915.184	1162.8
aten_s0097.g21	collagen alpha-1(I) chain-like	4678	1504	912.152	1158.94
aten_s0093.g38	serine/threonine-protein phosphatase 6 catalytic subunit	2258	1504	912.152	1158.94
aten_s0013.g179	AP-5 complex subunit zeta-1-like	2890	1502	910.939	1157.4
aten_s0005.g71	UV excision repair protein RAD23 homolog A-like	2760	1501	910.332	1156.63
aten_s0648.g5	protein ALP1-like	1523	1496	907.3	1152.78
aten_s0025.g15	arylsulfatase B-like	2493	1496	907.3	1152.78
aten_s0123.g34	LIM domain only protein 3-like	623	1496	907.3	1152.78
aten_s0053.g117	trinucleotide repeat-containing gene 6B protein-like	5926	1496	907.3	1152.78
aten_s0009.g17	major facilitator superfamily domain-containing protein 1-like isoform X2	2792	1495	906.693	1152.01
aten_s0009.g88	signal peptide peptidase-like 3	1611	1494	906.087	1151.24
aten_s0388.g2		843	1492	904.874	1149.7
aten_s0076.g8	S-adenosylhomocysteine hydrolase-like protein 1 isoform X3	3502	1492	904.874	1149.7
aten_s0045.g27	Retrovirus-related Pol polyprotein from transposon TNT 1-94.*Nicotiana tabacum OX=4097 PE=2 SV=1	3783	1490	903.661	1148.16
aten_s0231.g10		1930	1486	901.235	1145.07
aten_s0162.g27		3286	1486	901.235	1145.07
aten_s0251.g7	cyclin-dependent kinase 17-like	3885	1484	900.022	1143.53
aten_s0057.g22	somatomedin-B and thrombospondin type-1 domain-containing protein-like	2958	1484	900.022	1143.53
aten_s0042.g52	receptor expression-enhancing protein 1-like isoform X1	2920	1482	898.809	1141.99
aten_s0246.g22		586	1480	897.596	1140.45
aten_s0050.g66	LOW QUALITY PROTEIN: protein NLRC3-like	4557	1480	897.596	1140.45
aten_s0168.g23	phospholipid-transporting ATPase IA-like isoform X2	5248	1476	895.17	1137.37
aten_s0139.g52	DDB1- and CUL4-associated factor 11-like	3312	1476	895.17	1137.37
aten_s0134.g31	gamma-secretase-activating protein-like	3799	1473	893.351	1135.06
aten_s0271.g2		5040	1472	892.744	1134.28
aten_s0097.g16	LOW QUALITY PROTEIN: complement C3-like	5873	1469	890.925	1131.97
aten_s0136.g41	ruvB-like 1	2669	1466	889.105	1129.66
aten_s0067.g83		1075	1466	889.105	1129.66
aten_s0007.g144	chymotrypsin-like protease CTRL-1	2283	1464	887.892	1128.12
aten_s0067.g150	PAN2-PAN3 deadenylation complex catalytic subunit PAN2-like isoform X1	4322	1464	887.892	1128.12
aten_s0125.g46	double-stranded RNA-binding protein Staufen homolog 2-like	4256	1462	886.679	1126.58
aten_s0042.g61	potassium voltage-gated channel protein Shal-like	1909	1462	886.679	1126.58
aten_s0093.g44	protein transport protein Sec31A-like isoform X1	5532	1461	886.073	1125.81
aten_s0024.g21		1883	1458	884.253	1123.5
aten_s0043.g97		1317	1458	884.253	1123.5
aten_s0001.g314	unconventional myosin-XVIIIa-like isoform X2	3533	1458	884.253	1123.5
aten_s0033.g33	ankyrin repeat and EF-hand domain-containing protein 1-like	3459	1456	883.041	1121.96
aten_s0028.g10	putative protein TPRXL isoform X2	2815	1450	879.402	1117.33
aten_s0248.g14		1096	1444	875.763	1112.71
aten_s0103.g23	fukutin-related protein-like isoform X1	1487	1444	875.763	1112.71
aten_s0001.g174		2872	1444	875.763	1112.71
aten_s0178.g32	acetyl-coenzyme A transporter 1-like	3664	1442	874.55	1111.17
aten_s0045.g44	ADP-ribosylation factor-like	2594	1442	874.55	1111.17
aten_s0403.g3	coiled-coil domain-containing protein 25-like isoform X1	1745	1441	873.943	1110.4
aten_s0036.g38		2618	1438	872.124	1108.09
aten_s0209.g10	Golgi SNAP receptor complex member 2-like isoform X1	2387	1437	871.517	1107.31
aten_s0021.g5	reticulophagy regulator 3-like isoform X2	2274	1434	869.698	1105
aten_s0002.g280	ankycorbin-like	3305	1434	869.698	1105
aten_s0037.g19	sodium- and chloride-dependent transporter XTRP3-like isoform X1	2199	1433	869.091	1104.23
aten_s0089.g92	protein mono-ADP-ribosyltransferase PARP14-like	11161	1429	866.665	1101.15
aten_s0365.g9	tetratricopeptide repeat protein 28-like	3585	1428	866.059	1100.38
aten_s0055.g64	1-phosphatidylinositol 4,5-bisphosphate phosphodiesterase beta-4-like	5211	1428	866.059	1100.38
aten_s0202.g10	NACHT domain- and WD repeat-containing protein 1-like	6800	1426	864.846	1098.84
aten_s0049.g22	dyslexia-associated protein KIAA0319-like protein isoform X1	6031	1424	863.633	1097.3
aten_s0282.g10		12026	1422	862.42	1095.76
aten_s0003.g32		660	1420	861.207	1094.21
aten_s0355.g17	protein FAM149B1-like	3985	1419	860.601	1093.44
aten_s0014.g156	60S ribosomal protein L15-like	1321	1419	860.601	1093.44
aten_s0101.g5		3227	1418	859.994	1092.67
aten_s0035.g124	Protein Jumonji.*Gallus gallus OX=9031 GN=JARID2 PE=2 SV=1	6579	1418	859.994	1092.67
aten_s0038.g105	periodic tryptophan protein 1 homolog	2468	1417	859.388	1091.9
aten_s0012.g190	GON-4-like protein	5198	1417	859.388	1091.9
aten_s0068.g36	electroneutral sodium bicarbonate exchanger 1-like isoform X1	5077	1416	858.781	1091.13
aten_s0055.g51	equilibrative nucleoside transporter 1-like isoform X1	2579	1416	858.781	1091.13
aten_s0019.g63	trichohyalin-like	3893	1416	858.781	1091.13
aten_s0016.g86		3618	1414	857.568	1089.59
aten_s0063.g70	ubiquitin carboxyl-terminal hydrolase 35-like	3437	1413	856.962	1088.82
aten_s0013.g34	splicing regulatory glutamine/lysine-rich protein 1-like	1219	1412	856.355	1088.05
aten_s0101.g11	little elongation complex subunit 2-like isoform X1	2722	1411	855.749	1087.28
aten_s0119.g24		1460	1411	855.749	1087.28
aten_s0181.g32	ribosome biogenesis protein BMS1 homolog isoform X1	4831	1410	855.142	1086.51
aten_s0026.g56	MOB kinase activator 1B	2753	1410	855.142	1086.51
aten_s0105.g38		2105	1408	853.929	1084.97
aten_s0344.g7		2860	1407	853.323	1084.2
aten_s0194.g32	homeobox protein PKNOX1-like	3077	1406	852.716	1083.43
aten_s0006.g40		2578	1406	852.716	1083.43
aten_s0188.g25	chromosome alignment-maintaining phosphoprotein 1-like	5430	1405	852.11	1082.66
aten_s0050.g15	probable serine/threonine-protein kinase DDB_G0271682	738	1404	851.503	1081.89
aten_s0035.g57	late histone H1-like	2988	1404	851.503	1081.89
aten_s0055.g123	endoplasmic reticulum resident protein 44-like	3198	1404	851.503	1081.89
aten_s0307.g11		830	1402	850.29	1080.34
aten_s0018.g23	RING finger protein 17-like isoform X2	5015	1402	850.29	1080.34
aten_s0051.g66		3658	1401	849.684	1079.57
aten_s0208.g14		734	1400	849.077	1078.8
aten_s0316.g5	LOW QUALITY PROTEIN: NFX1-type zinc finger-containing protein 1-like	5977	1398	847.864	1077.26
aten_s0015.g31	XIAP-associated factor 1-like	1199	1398	847.864	1077.26
aten_s0062.g102		2038	1397	847.258	1076.49
aten_s0035.g65	histone H1, orphon-like	1094	1396	846.651	1075.72
aten_s0065.g69	SNF-related serine/threonine-protein kinase-like	3452	1396	846.651	1075.72
aten_s0056.g83	probable 28S ribosomal protein S25, mitochondrial	1085	1396	846.651	1075.72
aten_s0067.g167	extracellular calcium-sensing receptor-like	3172	1396	846.651	1075.72
aten_s0029.g144	protein SPT2 homolog	4565	1395	846.045	1074.95
aten_s0030.g85	multiple myeloma tumor-associated protein 2 homolog isoform X1	1439	1394	845.439	1074.18
aten_s0410.g9		2135	1392	844.226	1072.64
aten_s0143.g31	receptor-type tyrosine-protein phosphatase R-like isoform X1	3917	1392	844.226	1072.64
aten_s0441.g7	U4/U6.U5 tri-snRNP-associated protein 1-like	4663	1386	840.587	1068.02
aten_s0025.g98		2922	1386	840.587	1068.02
aten_s0417.g4	DNA repair-scaffolding protein-like isoform X2	1715	1384	839.374	1066.47
aten_s0107.g48	glycine-rich domain-containing protein 1-like	3292	1384	839.374	1066.47
aten_s0028.g149	two pore calcium channel protein 1-like	6097	1384	839.374	1066.47
aten_s0001.g246	NADH-ubiquinone oxidoreductase subunit 8-like	891	1383	838.767	1065.7
aten_s0084.g132	CUB and peptidase domain-containing protein 2-like	1187	1382	838.161	1064.93
aten_s0046.g173	GRIP and coiled-coil domain-containing protein 2-like	9637	1382	838.161	1064.93
aten_s0098.g40	structural maintenance of chromosomes protein 4-like	5521	1380	836.948	1063.39
aten_s0047.g103	KH domain-containing, RNA-binding, signal transduction-associated protein 3-like isoform X1	4509	1380	836.948	1063.39
aten_s0005.g315	calponin homology domain-containing protein DDB_G0272472-like isoform X3	4069	1378	835.735	1061.85
aten_s0039.g97		2537	1376	834.522	1060.31
aten_s0221.g12		944	1374	833.309	1058.77
aten_s0094.g55	solute carrier family 2, facilitated glucose transporter member 8-like isoform X2	1720	1374	833.309	1058.77
aten_s0344.g6		3451	1373	832.702	1058
aten_s0060.g60	cyclin-dependent kinase 2-like	1617	1368	829.67	1054.15
aten_s0170.g9	ragulator complex protein LAMTOR1-like	2084	1367	829.063	1053.37
aten_s0138.g9	son of sevenless homolog 1-like	4638	1366	828.457	1052.6
aten_s0279.g16	microtubule-associated tumor suppressor 1 homolog isoform X2	5150	1366	828.457	1052.6
aten_s0051.g35	programmed cell death protein 7-like	3601	1365	827.85	1051.83
aten_s0125.g37	S-phase kinase-associated protein 1 isoform X1	2586	1364	827.244	1051.06
aten_s0284.g14	multiple C2 and transmembrane domain-containing protein 1-like isoform X3	2985	1362	826.031	1049.52
aten_s0052.g130	LOW QUALITY PROTEIN: nesprin-1-like	25914	1362	826.031	1049.52
aten_s0010.g113		2594	1360	824.818	1047.98
aten_s0074.g59		5387	1358	823.605	1046.44
aten_s0306.g6		3273	1356	822.392	1044.9
aten_s0069.g29	putative Ras-related protein Rab-33	3306	1356	822.392	1044.9
aten_s0236.g1	barrier-to-autointegration factor-like	592	1352	819.966	1041.82
aten_s0408.g5	transcription initiation factor TFIID subunit 3-like	2986	1350	818.753	1040.27
aten_s0117.g42	INO80 complex subunit D-like isoform X1	4221	1350	818.753	1040.27
aten_s0194.g13	dynein heavy chain 8, axonemal-like	12280	1348	817.54	1038.73
aten_s0107.g15	pantetheinase-like	2550	1348	817.54	1038.73
aten_s0128.g33	histone deacetylase complex subunit SAP130-like isoform X3	3634	1348	817.54	1038.73
aten_s0372.g4	nodal modulator 3-like	4108	1346	816.327	1037.19
aten_s0021.g115		7674	1346	816.327	1037.19
aten_s0011.g82	tetratricopeptide repeat protein 14-like isoform X3	2457	1344	815.114	1035.65
aten_s0095.g34	monocarboxylate transporter 10-like	2734	1342	813.901	1034.11
aten_s0157.g20	protein DEK-like	3327	1339	812.082	1031.8
aten_s0534.g1		1317	1338	811.475	1031.03
aten_s0180.g55	protein FAM133B-like isoform X2	1242	1338	811.475	1031.03
aten_s0454.g3		3021	1332	807.837	1026.4
aten_s0079.g51	centromere protein C-like	4568	1332	807.837	1026.4
aten_s0094.g40	elongator complex protein 6-like isoform X1	1913	1330	806.624	1024.86
aten_s0062.g78	26S proteasome non-ATPase regulatory subunit 1-like	3265	1328	805.411	1023.32
aten_s0029.g149	tyrosine-protein kinase BAZ1B-like	6392	1328	805.411	1023.32
aten_s0007.g179	sorting nexin-29-like isoform X1	3995	1327	804.804	1022.55
aten_s0049.g163	sorting nexin-17-like	2727	1326	804.198	1021.78
aten_s0187.g18		2872	1322	801.772	1018.7
aten_s0240.g34	major facilitator superfamily domain-containing protein 6-like	2521	1322	801.772	1018.7
aten_s0058.g150	growth/differentiation factor 6-A-like	4196	1318	799.346	1015.62
aten_s0042.g122	dynein heavy chain 1, axonemal-like	13020	1317	798.739	1014.85
aten_s0206.g35	titin homolog	5177	1316	798.133	1014.08
aten_s0117.g91	lysosomal alpha-mannosidase-like isoform X1	3645	1315	797.526	1013.3
aten_s0452.g1		1726	1314	796.92	1012.53
aten_s0079.g69		4991	1314	796.92	1012.53
aten_s0363.g3	LOW QUALITY PROTEIN: protein NLRC3-like	3388	1313	796.313	1011.76
aten_s0039.g101		1089	1312	795.707	1010.99
aten_s0126.g27		1530	1311	795.1	1010.22
aten_s0353.g8	protein FAM102B-like isoform X2	1980	1310	794.494	1009.45
aten_s0031.g51	DIS3-like exonuclease 1 isoform X2	5652	1310	794.494	1009.45
aten_s0013.g208	LOW QUALITY PROTEIN: protein NLRC3-like	6289	1308	793.281	1007.91
aten_s0063.g42	Trimethylguanosine synthase.*Mus musculus OX=10090 GN=Tgs1 PE=1 SV=2	3849	1306	792.068	1006.37
aten_s0001.g213	EF-hand calcium-binding domain-containing protein 5-like	4476	1306	792.068	1006.37
aten_s0326.g1	tetratricopeptide repeat protein 28-like	3429	1304	790.855	1004.83
aten_s0025.g18	alpha-1,3-mannosyl-glycoprotein 4-beta-N-acetylglucosaminyltransferase B-like isoform X1	2104	1304	790.855	1004.83
aten_s0369.g16		787	1303	790.248	1004.06
aten_s0140.g8	leucine-rich repeat and guanylate kinase domain-containing protein-like	3755	1300	788.429	1001.75
aten_s0031.g17	golgin subfamily A member 4-like	13880	1300	788.429	1001.75
aten_s0221.g26	stress response protein NST1-like	2039	1298	787.216	1000.2
aten_s0001.g274	regulator of G-protein signaling 22-like isoform X1	6749	1297	786.61	999.434
aten_s0037.g18	probable methyltransferase TARBP1 isoform X2	6558	1296	786.003	998.664
aten_s0062.g26		1500	1296	786.003	998.664
aten_s0108.g29	BTB/POZ domain-containing protein 9-like	3158	1296	786.003	998.664
aten_s0088.g68	FAS-associated factor 2-like	871	1296	786.003	998.664
aten_s0024.g10	protein phosphatase 1 regulatory subunit 12B-like isoform X1	4569	1292	783.577	995.581
aten_s0051.g15		7753	1292	783.577	995.581
aten_s0002.g249	alpha-1,6-mannosyl-glycoprotein 4-beta-N-acetylglucosaminyltransferase-like	1485	1292	783.577	995.581
aten_s0872.g1		1918	1286	779.938	990.958
aten_s0019.g86		5165	1286	779.938	990.958
aten_s0007.g142	LOW QUALITY PROTEIN: dynein heavy chain domain-containing protein 1-like	16385	1286	779.938	990.958
aten_s0221.g37	sorbin and SH3 domain-containing protein 1-like isoform X1	4184	1285	779.332	990.187
aten_s0180.g62	matrix metalloproteinase-25-like isoform X1	2692	1285	779.332	990.187
aten_s0284.g19	serine/threonine-protein kinase ksp1-like	5207	1282	777.512	987.876
aten_s0120.g35	myosin-4-like isoform X2	3578	1282	777.512	987.876
aten_s0012.g110	eukaryotic translation initiation factor 2 subunit 3, Y-linked	2424	1281	776.906	987.105
aten_s0001.g349	ATP-dependent RNA helicase DDX55-like	2567	1281	776.906	987.105
aten_s0067.g20	ZP domain-containing protein-like isoform X1	2481	1280	776.299	986.335
aten_s0079.g55		2106	1280	776.299	986.335
aten_s0010.g64	myoferlin-like	7149	1280	776.299	986.335
aten_s0067.g188	KAT8 regulatory NSL complex subunit 3-like	5097	1280	776.299	986.335
aten_s0156.g27	pericentriolar material 1 protein-like isoform X1	5648	1278	775.086	984.793
aten_s0166.g46	E3 ubiquitin-protein ligase HECTD1-like isoform X1	9145	1278	775.086	984.793
aten_s0418.g3		2088	1276	773.873	983.252
aten_s0010.g118		5626	1276	773.873	983.252
aten_s0007.g71	switch-associated protein 70-like	3804	1271	770.841	979.399
aten_s0016.g117	chromodomain-helicase-DNA-binding protein 5-like isoform X4	7255	1271	770.841	979.399
aten_s0583.g1	E3 ubiquitin-protein ligase UPL2-like	1631	1270	770.235	978.629
aten_s0059.g33	afadin-like	8336	1268	769.022	977.088
aten_s0110.g67	noggin-like	1781	1266	767.809	975.546
aten_s0019.g61	thiosulfate sulfurtransferase-like	3329	1265	767.202	974.776
aten_s0387.g7	pumilio homolog 2-like isoform X2	5071	1264	766.596	974.005
aten_s0223.g35	seipin-like isoform X2	3058	1264	766.596	974.005
aten_s0111.g19	LOW QUALITY PROTEIN: charged multivesicular body protein 2a-like	2555	1262	765.383	972.464
aten_s0101.g21	ataxin-7-like protein 3	1824	1260	764.17	970.923
aten_s0062.g79	protein unc-80 homolog isoform X1	9894	1260	764.17	970.923
aten_s0133.g14	echinoderm microtubule-associated protein-like 6	4591	1258	762.957	969.382
aten_s0084.g125	splicing factor 3A subunit 2-like	3149	1258	762.957	969.382
aten_s0012.g195	ubiquitin-associated protein 2-like isoform X2	3571	1258	762.957	969.382
aten_s0092.g59	transcriptional regulator Myc-B-like isoform X2	2172	1256	761.744	967.841
aten_s0121.g3		7340	1254	760.531	966.3
aten_s0297.g8	SH3 domain-containing protein 19-like	4730	1254	760.531	966.3
aten_s0219.g10	ubiA prenyltransferase domain-containing protein 1-like	1639	1254	760.531	966.3
aten_s0088.g31	xin actin-binding repeat-containing protein 2-like isoform X1	5006	1254	760.531	966.3
aten_s0358.g3	astacin-like metalloprotease toxin 1	2164	1253	759.924	965.529
aten_s0221.g2	NADH dehydrogenase	6475	1252	759.318	964.758
aten_s0019.g83		4466	1252	759.318	964.758
aten_s0306.g2	gamma-aminobutyric acid receptor-associated protein-like 2	915	1250	758.105	963.217
aten_s0040.g119	kelch-like protein 20	3770	1250	758.105	963.217
aten_s0013.g151	ras-related protein Rab-37-like	2086	1249	757.498	962.447
aten_s0340.g3	tetratricopeptide repeat protein 28-like	2523	1248	756.892	961.676
aten_s0029.g62	la-related protein 1B-like	5387	1248	756.892	961.676
aten_s0028.g77	molybdenum cofactor biosynthesis protein 1-like	2467	1248	756.892	961.676
aten_s0133.g18	ribosome biogenesis regulatory protein homolog	1714	1244	754.466	958.594
aten_s0196.g26	neurogenic locus notch homolog protein 2-like	4417	1244	754.466	958.594
aten_s0157.g33	ras-related protein Rab-23-like	3107	1244	754.466	958.594
aten_s0089.g57	mastermind-like protein 3	3634	1243	753.859	957.823
aten_s0085.g60	LOW QUALITY PROTEIN: transcriptional protein SWT1-like	4199	1242	753.253	957.053
aten_s0006.g168	receptor-type tyrosine-protein phosphatase gamma-like isoform X1	4277	1242	753.253	957.053
aten_s0055.g144		2442	1241	752.646	956.282
aten_s0138.g25		8672	1240	752.04	955.512
aten_s0018.g47	unconventional myosin-VI-like	4180	1240	752.04	955.512
aten_s0065.g60	tripartite motif-containing protein 45-like isoform X1	2562	1240	752.04	955.512
aten_s0088.g69		1084	1238	750.827	953.97
aten_s0024.g97	coronin-1B-like isoform X1	3986	1237	750.221	953.2
aten_s0273.g12	titin-like isoform X6	2354	1236	749.614	952.429
aten_s0033.g87	grpE protein homolog 1, mitochondrial-like	1839	1236	749.614	952.429
aten_s0053.g92	myocardin-related transcription factor A-like isoform X1	4098	1236	749.614	952.429
aten_s0002.g152	ralBP1-associated Eps domain-containing protein 1-like isoform X3	3729	1236	749.614	952.429
aten_s0049.g148	zinc finger protein 385B-like	1551	1235	749.008	951.659
aten_s0088.g2	bystin-like isoform X1	3252	1232	747.188	949.347
aten_s0189.g16		9034	1230	745.975	947.806
aten_s0054.g31	PX domain-containing protein kinase-like protein	3745	1230	745.975	947.806
aten_s0221.g7		2190	1229	745.369	947.035
aten_s0162.g25		2921	1228	744.762	946.265
aten_s0104.g39	retinoic acid receptor RXR-alpha-B-like	2331	1226	743.549	944.724
aten_s0019.g84		9673	1226	743.549	944.724
aten_s0043.g21		3231	1224	742.336	943.182
aten_s0078.g23		8135	1224	742.336	943.182
aten_s0157.g39	ras-related protein Rab-10-like	1511	1224	742.336	943.182
aten_s0276.g2	NACHT, LRR and PYD domains-containing protein 10-like	4457	1223	741.73	942.412
aten_s0017.g103	histone acetyltransferase KAT6A-like isoform X2	3776	1223	741.73	942.412
aten_s0069.g73	1-phosphatidylinositol 4,5-bisphosphate phosphodiesterase gamma-1-like	3299	1222	741.123	941.641
aten_s0008.g154	anoctamin-8-like isoform X2	3560	1222	741.123	941.641
aten_s0243.g22		5965	1220	739.91	940.1
aten_s0055.g100		2956	1220	739.91	940.1
aten_s0187.g2		2421	1219	739.304	939.33
aten_s0317.g9	sterol regulatory element-binding protein 1-like	5543	1218	738.697	938.559
aten_s0060.g65	Collagen alpha chain (Fragment).*Acropora millepora OX=45264 PE=1 SV=1	4729	1218	738.697	938.559
aten_s0092.g73	neuronal acetylcholine receptor subunit alpha-10-like	1620	1218	738.697	938.559
aten_s0060.g79	collagen alpha-1(I) chain-like	5078	1216	737.484	937.018
aten_s0240.g20		2606	1213	735.665	934.706
aten_s0429.g4	splicing regulatory glutamine/lysine-rich protein 1-like, partial	2723	1210	733.845	932.394
aten_s0183.g44	tartrate-resistant acid phosphatase type 5-like	2011	1207	732.026	930.083
aten_s0367.g4		2401	1206	731.42	929.312
aten_s0079.g4		4062	1206	731.42	929.312
aten_s0139.g24	chitinase-like protein PB1E7.04c	3247	1206	731.42	929.312
aten_s0018.g32		6555	1206	731.42	929.312
aten_s0014.g6	Acidic skeletal organic matrix protein.*Acropora millepora OX=45264 PE=1 SV=1	2648	1204	730.207	927.771
aten_s0082.g31		2998	1204	730.207	927.771
aten_s0005.g76	calreticulin-like	2299	1203	729.6	927
aten_s0202.g7	protein diaphanous homolog 2-like	3740	1202	728.994	926.23
aten_s0137.g45	SCL-interrupting locus protein homolog isoform X1	4955	1202	728.994	926.23
aten_s0003.g240	multiple PDZ domain protein-like	6994	1202	728.994	926.23
aten_s0282.g16		846	1201	728.387	925.459
aten_s0009.g32	roundabout homolog 1-like isoform X1	5877	1201	728.387	925.459
aten_s0114.g10	zinc finger FYVE domain-containing protein 16-like isoform X1	5008	1199	727.174	923.918
aten_s0589.g4		2481	1198	726.568	923.147
aten_s0099.g10		5858	1198	726.568	923.147
aten_s0102.g46		2539	1197	725.961	922.377
aten_s0206.g11	CCAAT/enhancer-binding protein zeta-like isoform X2	4514	1196	725.355	921.606
aten_s0044.g78	peroxiredoxin-like 2C	3962	1196	725.355	921.606
aten_s0029.g88		3724	1196	725.355	921.606
aten_s0013.g121		21747	1194	724.142	920.065
aten_s0269.g11	N-acetyllactosaminide beta-1,6-N-acetylglucosaminyl-transferase-like	2916	1192	722.929	918.524
aten_s0006.g29		2396	1192	722.929	918.524
aten_s0146.g18	Histone H2A.*Acropora formosa OX=126732 PE=3 SV=2	574	1187	719.896	914.671
aten_s0083.g7		8152	1184	718.077	912.359
aten_s1353.g1	cat eye syndrome critical region protein 2 homolog	709	1182	716.864	910.818
aten_s0396.g6		2358	1180	715.651	909.277
aten_s0018.g97		3864	1179	715.044	908.507
aten_s0918.g2	glucosidase 2 subunit beta-like	1733	1178	714.438	907.736
aten_s0372.g10	vang-like protein 2	3392	1178	714.438	907.736
aten_s0052.g36	speedy protein A-like	1219	1178	714.438	907.736
aten_s0147.g1	WD repeat-containing protein 60-like isoform X2	4851	1175	712.619	905.424
aten_s0217.g17	inverted formin-2-like	6184	1174	712.012	904.654
aten_s0010.g20		3663	1174	712.012	904.654
aten_s0257.g20	nuclear receptor-binding factor 2-like isoform X1	2417	1174	712.012	904.654
aten_s0116.g41	nucleotide-binding oligomerization domain-containing protein 2-like	2037	1174	712.012	904.654
aten_s0067.g46	protein adenylyltransferase SelO, mitochondrial-like isoform X1	3287	1171	710.193	902.342
aten_s0067.g115	probable E3 ubiquitin-protein ligase HECTD2	4130	1171	710.193	902.342
aten_s0027.g31		2985	1170	709.586	901.571
aten_s0060.g82	collagen alpha-2(I) chain-like	7297	1170	709.586	901.571
aten_s0012.g127	major facilitator superfamily domain-containing protein 9-like	1424	1170	709.586	901.571
aten_s0245.g6		831	1168	708.373	900.03
aten_s0162.g11	protein transport protein Sec16A-like isoform X5	7916	1168	708.373	900.03
aten_s0012.g185	ubiquitin-conjugating enzyme E2 R2-like	1258	1168	708.373	900.03
aten_s0006.g248	ATP-dependent RNA helicase dbp4-like isoform X1	4178	1168	708.373	900.03
aten_s0042.g83	bromodomain-containing protein 8-like	3116	1167	707.767	899.26
aten_s0379.g19	adenosine receptor A1-like isoform X1	1895	1166	707.16	898.489
aten_s0085.g30	U6 snRNA-associated Sm-like protein LSm2	1155	1166	707.16	898.489
aten_s0011.g176	pyruvate dehydrogenase E1 component subunit beta, mitochondrial-like isoform X1	2338	1164	705.947	896.948
aten_s0088.g28	26S proteasome non-ATPase regulatory subunit 2-like	4329	1162	704.734	895.407
aten_s0073.g47		1370	1162	704.734	895.407
aten_s0056.g96		1410	1161	704.128	894.636
aten_s0323.g5		6220	1160	703.521	893.866
aten_s0166.g6		1635	1160	703.521	893.866
aten_s0490.g2		1401	1158	702.308	892.325
aten_s0194.g31		4992	1158	702.308	892.325
aten_s0011.g97	eukaryotic peptide chain release factor subunit 1	2833	1158	702.308	892.325
aten_s0096.g97		7382	1157	701.702	891.554
aten_s0009.g18	cAMP-dependent protein kinase catalytic subunit 3-like	3366	1156	701.095	890.783
aten_s0038.g33	serine protease HTRA2, mitochondrial-like	1574	1156	701.095	890.783
aten_s0004.g95		1419	1156	701.095	890.783
aten_s0012.g140		716	1155	700.489	890.013
aten_s0065.g2	pre-mRNA-splicing factor ATP-dependent RNA helicase PRP16-like isoform X1	4254	1152	698.669	887.701
aten_s0229.g17		1537	1152	698.669	887.701
aten_s0031.g113	stimulated by retinoic acid gene 6 protein-like	2309	1152	698.669	887.701
aten_s0022.g91		2020	1150	697.456	886.16
aten_s0001.g232	thioredoxin-like protein 4A	1587	1149	696.85	885.389
aten_s0005.g300	intersectin-1-like	2180	1149	696.85	885.389
aten_s0488.g7	voltage-dependent T-type calcium channel subunit alpha-1H-like	7320	1148	696.243	884.619
aten_s0011.g152	Alstrom syndrome protein 1.*Homo sapiens OX=9606 GN=ALMS1 PE=1 SV=4	5478	1148	696.243	884.619
aten_s0429.g9	transitional endoplasmic reticulum ATPase isoform X1	3406	1146	695.031	883.078
aten_s0067.g85		3013	1146	695.031	883.078
aten_s0011.g139	cilia- and flagella-associated protein 99-like	2137	1145	694.424	882.307
aten_s0218.g24		4466	1144	693.818	881.536
aten_s0093.g48	coatomer subunit beta-like	3119	1143	693.211	880.766
aten_s0008.g92		1454	1142	692.605	879.995
aten_s0008.g64	serine/threonine-protein kinase SMG1-like	12431	1140	691.392	878.454
aten_s0175.g7	E3 ubiquitin-protein ligase RBBP6-like	3688	1139	690.785	877.684
aten_s0280.g17	vascular endothelial growth factor A-like	1841	1138	690.179	876.913
aten_s0050.g13	probable serine/threonine-protein kinase DDB_G0271682	1711	1136	688.966	875.372
aten_s0270.g19	leucine-rich repeat-containing protein 73-like	1137	1136	688.966	875.372
aten_s0017.g73	ephrin type-A receptor 5-like isoform X2	4221	1132	686.54	872.29
aten_s0034.g93	ethanolamine-phosphate cytidylyltransferase-like	2260	1132	686.54	872.29
aten_s0012.g141		1328	1132	686.54	872.29
aten_s0003.g232	tumor necrosis factor receptor superfamily member 16-like	3235	1131	685.933	871.519
aten_s0081.g9	BRD4-interacting chromatin-remodeling complex-associated protein-like	4173	1130	685.327	870.748
aten_s0112.g20	mucin-like protein isoform X1	8565	1130	685.327	870.748
aten_s0116.g21	translocon-associated protein subunit alpha-like	2548	1130	685.327	870.748
aten_s0037.g48	F-box/LRR-repeat protein 17-like	1881	1130	685.327	870.748
aten_s0033.g83	kinesin-like protein KIF14	5276	1130	685.327	870.748
aten_s0273.g5	hemicentin-1-like isoform X1	6332	1128	684.114	869.207
aten_s0009.g206	eukaryotic translation initiation factor 4H-like isoform X4	3431	1128	684.114	869.207
aten_s0081.g11	ZP domain-containing protein-like	3708	1126	682.901	867.666
aten_s0061.g39	chymotrypsinogen B-like	1061	1126	682.901	867.666
aten_s0047.g57	kinase suppressor of Ras 2-like isoform X3	5803	1124	681.688	866.125
aten_s0115.g12	titin-like	2832	1120	679.262	863.043
aten_s0206.g17	zinc finger FYVE domain-containing protein 26-like	10686	1119	678.655	862.272
aten_s0403.g7	centrosomal protein of 290 kDa-like isoform X3	5904	1118	678.049	861.502
aten_s0188.g35		1327	1118	678.049	861.502
aten_s0010.g131		3012	1118	678.049	861.502
aten_s0015.g141	collectin-12-like isoform X1	3357	1116	676.836	859.96
aten_s0108.g51	histamine N-methyltransferase-like	2701	1114	675.623	858.419
aten_s0078.g61	X-ray repair cross-complementing protein 5-like isoform X1	2324	1114	675.623	858.419
aten_s0168.g20	exosome complex component RRP45-like	1565	1113	675.017	857.649
aten_s0138.g2	centromere-associated protein E-like isoform X5	2605	1112	674.41	856.878
aten_s0052.g142	spectrin beta chain, non-erythrocytic 1-like isoform X1	8032	1112	674.41	856.878
aten_s0006.g193	fibronectin type III domain-containing protein-like	4802	1112	674.41	856.878
aten_s0110.g15	integrator complex subunit 1-like	6930	1110	673.197	855.337
aten_s0117.g50		3178	1110	673.197	855.337
aten_s0027.g102	LOW QUALITY PROTEIN: DNA repair protein XRCC1-like	2325	1110	673.197	855.337
aten_s0134.g21	trichohyalin-like	7608	1107	671.378	853.025
aten_s0002.g34	DEP domain-containing mTOR-interacting protein-like, partial	2043	1106	670.771	852.255
aten_s0011.g70		3820	1106	670.771	852.255
aten_s0150.g34	leukocyte receptor cluster member 8-like isoform X3	3106	1104	669.558	850.714
aten_s0072.g21	deleted in malignant brain tumors 1 protein-like isoform X1	6376	1102	668.345	849.172
aten_s0006.g80	calcium-dependent secretion activator 1-like isoform X2	4362	1102	668.345	849.172
aten_s0056.g35	CCAAT/enhancer-binding protein gamma-like	2467	1101	667.739	848.402
aten_s0024.g72	AP-3 complex subunit sigma-1-like	2151	1101	667.739	848.402
aten_s0408.g4	voltage-dependent calcium channel subunit alpha-2/delta-2-like isoform X1	4822	1100	667.132	847.631
aten_s0049.g93	splicing factor 1-like, partial	3837	1100	667.132	847.631
aten_s0041.g25	protein Aster-A-like isoform X2	2515	1098	665.919	846.09
aten_s0005.g101	protein FAM32A-like	1240	1097	665.313	845.32
aten_s0279.g10		5366	1096	664.706	844.549
aten_s0009.g4	putative nuclease HARBI1	1266	1094	663.493	843.008
aten_s0111.g21	ubiquitin-conjugating enzyme E2 E1-like isoform X1	1924	1092	662.28	841.467
aten_s0037.g77	proline-rich protein 12-like	2274	1092	662.28	841.467
aten_s0049.g143	rRNA-processing protein efg1-like isoform X1	1892	1090	661.067	839.925
aten_s0049.g145		1518	1090	661.067	839.925
aten_s0076.g7		1924	1088	659.854	838.384
aten_s0053.g46	protein tweety homolog 1-B-like	2743	1088	659.854	838.384
aten_s0172.g16	putative pre-mRNA-splicing factor ATP-dependent RNA helicase PRP1 isoform X1	3039	1086	658.641	836.843
aten_s0141.g24	tripartite motif-containing protein 2-like	3574	1086	658.641	836.843
aten_s0194.g26	dixin-like	4339	1086	658.641	836.843
aten_s0130.g47		4779	1085	658.035	836.073
aten_s0424.g1	UPF0577 protein KIAA1324-like isoform X2	2681	1083	656.822	834.531
aten_s0123.g30	dedicator of cytokinesis protein 1-like isoform X2	5786	1082	656.216	833.761
aten_s0040.g45	LOW QUALITY PROTEIN: alkylglycerol monooxygenase-like	2196	1082	656.216	833.761
aten_s0002.g70	52 kDa repressor of the inhibitor of the protein kinase-like	1144	1082	656.216	833.761
aten_s0274.g3		1037	1080	655.003	832.22
aten_s0167.g8		1574	1080	655.003	832.22
aten_s0245.g8		1568	1078	653.79	830.679
aten_s0001.g118	heterogeneous nuclear ribonucleoprotein L-like	3706	1078	653.79	830.679
aten_s0143.g13		2422	1076	652.577	829.137
aten_s0156.g19	tudor domain-containing protein 3-like isoform X1	4719	1074	651.364	827.596
aten_s0020.g21	dedicator of cytokinesis protein 11-like	491	1074	651.364	827.596
aten_s0069.g64		3562	1073	650.757	826.826
aten_s0140.g7	leucine-rich repeat and guanylate kinase domain-containing protein-like	1004	1072	650.151	826.055
aten_s0263.g17	LOW QUALITY PROTEIN: nesprin-1-like	39382	1072	650.151	826.055
aten_s0010.g154		2161	1072	650.151	826.055
aten_s0052.g63	mucin-2-like isoform X4	1626	1071	649.544	825.285
aten_s0013.g69		2098	1070	648.938	824.514
aten_s0055.g69	la-related protein 7-like	2578	1070	648.938	824.514
aten_s0077.g14	tRNA-splicing endonuclease subunit Sen2-like isoform X1	1790	1068	647.725	822.973
aten_s0690.g2	fibroblast growth factor receptor 3-like	778	1066	646.512	821.432
aten_s0413.g3	conserved oligomeric Golgi complex subunit 2-like	1723	1066	646.512	821.432
aten_s0230.g8		2216	1066	646.512	821.432
aten_s0044.g28	RNA polymerase-associated protein RTF1 homolog	3059	1066	646.512	821.432
aten_s0014.g86	tumor necrosis factor receptor superfamily member 1A-like	3103	1066	646.512	821.432
aten_s0292.g4	E3 ubiquitin-protein ligase TRIM56-like	3949	1062	644.086	818.349
aten_s0117.g4	centromere-associated protein E-like	4692	1062	644.086	818.349
aten_s0040.g8	fibroblast growth factor 8-like	1657	1062	644.086	818.349
aten_s0019.g105	oral-facial-digital syndrome 1 protein-like	2519	1062	644.086	818.349
aten_s0005.g296	protein FORGETTER 1-like isoform X1	3637	1062	644.086	818.349
aten_s0483.g1	pescadillo homolog	726	1060	642.873	816.808
aten_s0226.g20	lymphoid-restricted membrane protein-like	5426	1060	642.873	816.808
aten_s0079.g45	potassium voltage-gated channel protein Shaw-like	3290	1060	642.873	816.808
aten_s0079.g6	transcription elongation factor A N-terminal and central domain-containing protein 2-like isoform X1	4357	1059	642.266	816.038
aten_s0111.g59		2502	1058	641.66	815.267
aten_s0016.g60		2623	1058	641.66	815.267
aten_s0047.g95	protein-glucosylgalactosylhydroxylysine glucosidase-like	2274	1058	641.66	815.267
aten_s0089.g12		3930	1057	641.053	814.497
aten_s0001.g313	fibrosin-1-like protein isoform X4	4149	1057	641.053	814.497
aten_s0095.g32	centrosomal protein of 135 kDa-like	3017	1056	640.447	813.726
aten_s0053.g94	TGF-beta-activated kinase 1 and MAP3K7-binding protein 1-like	2541	1056	640.447	813.726
aten_s0192.g20	tetratricopeptide repeat protein 12-like isoform X2	3752	1054	639.234	812.185
aten_s0130.g21	beta-1,4-galactosyltransferase 1-like	2172	1053	638.628	811.414
aten_s0893.g3	far upstream element-binding protein 2-like isoform X4	1963	1052	638.021	810.644
aten_s0150.g5	late histone H2A.2.2-like	942	1052	638.021	810.644
aten_s0087.g22	cytochrome P450 3A21-like	3423	1052	638.021	810.644
aten_s0026.g40	transcriptional activator protein Pur-alpha-like	1765	1052	638.021	810.644
aten_s0124.g9		1889	1050	636.808	809.103
aten_s0087.g14	biogenesis of lysosome-related organelles complex 1 subunit 6-like	2350	1050	636.808	809.103
aten_s0146.g27	sacsin-like	5719	1050	636.808	809.103
aten_s0125.g49	solute carrier organic anion transporter family member 4A1-like	2804	1050	636.808	809.103
aten_s0001.g114	vitamin K epoxide reductase complex subunit 1-like	1724	1050	636.808	809.103
aten_s0676.g4	protein strawberry notch homolog 1-like	1275	1049	636.202	808.332
aten_s0034.g98	E3 ubiquitin-protein ligase RNF185-like	2164	1048	635.595	807.561
aten_s0005.g188	spliceosome-associated protein CWC15 homolog	2535	1048	635.595	807.561
aten_s0112.g19	expansin-like protein 1 isoform X2	1285	1046	634.382	806.02
aten_s0168.g26	adenylate cyclase type 9-like	6460	1046	634.382	806.02
aten_s0150.g33	Cytochrome c oxidase subunit 6B1.*Mus musculus OX=10090 GN=Cox6b1 PE=1 SV=2	691	1046	634.382	806.02
aten_s0010.g35		6359	1046	634.382	806.02
aten_s0009.g236	INO80 complex subunit B-like	1786	1046	634.382	806.02
aten_s0150.g37	peptidyl-tRNA hydrolase ICT1, mitochondrial-like	1153	1044	633.169	804.479
aten_s0040.g113	pappalysin-1-like	6812	1044	633.169	804.479
aten_s0094.g50	solute carrier family 2, facilitated glucose transporter member 8-like	3088	1043	632.563	803.709
aten_s0055.g91	pre-mRNA-splicing factor CWC25 homolog isoform X1	3122	1043	632.563	803.709
aten_s0281.g12		945	1042	631.956	802.938
aten_s0045.g33	dr1-associated corepressor-like	2377	1042	631.956	802.938
aten_s0677.g1	E3 SUMO-protein ligase KIAA1586-like	2409	1040	630.743	801.397
aten_s0476.g2		470	1040	630.743	801.397
aten_s0166.g24	excitatory amino acid transporter 1-like	3457	1039	630.137	800.626
aten_s0018.g7	centrosomal protein of 162 kDa-like isoform X2	6356	1038	629.53	799.856
aten_s0178.g10	interferon-induced very large GTPase 1-like isoform X1	4844	1038	629.53	799.856
aten_s0039.g106		2590	1038	629.53	799.856
aten_s0122.g10	dynein heavy chain 5, axonemal-like	14508	1034	627.104	796.773
aten_s0102.g15		20451	1034	627.104	796.773
aten_s0216.g25		4884	1034	627.104	796.773
aten_s0159.g25		7346	1034	627.104	796.773
aten_s0209.g13	mitogen-activated protein kinase kinase kinase 3-like isoform X3	2584	1032	625.891	795.232
aten_s0093.g19	selenocysteine insertion sequence-binding protein 2-like isoform X1	2975	1032	625.891	795.232
aten_s0146.g25	sacsin-like	14006	1030	624.678	793.691
aten_s0005.g171	vacuolar segregation protein PEP7-like	3224	1030	624.678	793.691
aten_s0091.g51	COP9 signalosome complex subunit 5-like	1710	1028	623.465	792.15
aten_s0023.g66	LOW QUALITY PROTEIN: pre-mRNA-processing factor 6-like	3146	1027	622.859	791.379
aten_s0371.g5		3179	1026	622.252	790.609
aten_s0061.g9	sugar phosphate exchanger 3-like	2965	1026	622.252	790.609
aten_s0049.g175	transcription factor CP2-like isoform X1	2918	1026	622.252	790.609
aten_s0132.g51		3871	1025	621.646	789.838
aten_s0098.g49		1559	1024	621.039	789.068
aten_s0041.g76		1777	1024	621.039	789.068
aten_s0026.g129	oxysterol-binding protein-related protein 11-like isoform X3	3247	1024	621.039	789.068
aten_s0194.g33	phosphatidylinositol-glycan-specific phospholipase D-like	3785	1022	619.827	787.526
aten_s0001.g235	RNA-binding protein cabeza-like isoform X1	1622	1022	619.827	787.526
aten_s0014.g111		3843	1020	618.614	785.985
aten_s0009.g113		2031	1020	618.614	785.985
aten_s0369.g13		1713	1018	617.401	784.444
aten_s0048.g108	glycoprotein-N-acetylgalactosamine 3-beta-galactosyltransferase 1-like	2572	1018	617.401	784.444
aten_s0138.g20	testis-expressed protein 30-like	1636	1017	616.794	783.674
aten_s0488.g4	brain-specific angiogenesis inhibitor 1-associated protein 2-like isoform X1	1918	1016	616.188	782.903
aten_s0005.g79	disabled homolog 2-like	4685	1016	616.188	782.903
aten_s0058.g121	TBC1 domain family member 2B-like isoform X1	4015	1016	616.188	782.903
aten_s0003.g246	leishmanolysin-like peptidase isoform X1	3391	1016	616.188	782.903
aten_s0001.g337	A-kinase anchor protein 1, mitochondrial-like	3578	1016	616.188	782.903
aten_s0067.g182	insulin-degrading enzyme-like	4908	1015	615.581	782.132
aten_s0207.g14	mutS protein homolog 5-like isoform X1	4864	1014	614.975	781.362
aten_s0075.g18	dual serine/threonine and tyrosine protein kinase-like	3725	1014	614.975	781.362
aten_s0019.g77		5296	1014	614.975	781.362
aten_s0192.g19	DDB1- and CUL4-associated factor 8-like	2584	1013	614.368	780.591
aten_s0072.g10	dimethylglycine dehydrogenase, mitochondrial-like	3662	1012	613.762	779.821
aten_s0008.g14	mitoferrin-1-like	749	1012	613.762	779.821
aten_s0108.g12		1626	1010	612.549	778.28
aten_s0091.g50	nuclear transcription factor Y subunit gamma-like	1721	1009	611.942	777.509
aten_s0215.g7	collagen alpha-6(VI) chain-like	16394	1008	611.336	776.738
aten_s0278.g13		2682	1008	611.336	776.738
aten_s0059.g27		2452	1008	611.336	776.738
aten_s0034.g113		4365	1007	610.729	775.968
aten_s0388.g1	NAD-dependent protein deacetylase sirtuin-6-like isoform X1	2821	1006	610.123	775.197
aten_s0357.g5		6294	1005	609.516	774.427
aten_s0095.g27	golgin subfamily A member 6-like protein 22 isoform X3	3507	1005	609.516	774.427
aten_s0100.g36	von Willebrand factor A domain-containing protein 7-like	2726	1004	608.91	773.656
aten_s0215.g26	histone deacetylase 4-like isoform X4	3432	1002	607.697	772.115
aten_s0199.g35	cation channel sperm-associated protein subunit gamma 2-like isoform X1	6592	1000	606.484	770.574
aten_s0001.g75	pre-mRNA-processing-splicing factor 8	7717	1000	606.484	770.574
aten_s0014.g4	Down syndrome cell adhesion molecule-like	6879	999	605.877	769.803
aten_s0452.g9		2837	998	605.271	769.033
aten_s0330.g20	rho-associated protein kinase 2-like isoform X1	5881	998	605.271	769.033
aten_s0107.g46	zinc finger MIZ domain-containing protein 1-like isoform X2	4227	996	604.058	767.492
aten_s0093.g72	CUGBP Elav-like family member 3-A isoform X2	2045	996	604.058	767.492
aten_s0006.g131	stabilin-2-like	8801	995	603.451	766.721
aten_s0149.g9		1604	994	602.845	765.95
aten_s0026.g25	RNA-binding protein cabeza-like	2015	994	602.845	765.95
aten_s0030.g74	BTB/POZ domain-containing protein 6-like	2437	994	602.845	765.95
aten_s0134.g52	histone-lysine N-methyltransferase 2D-like	1409	992	601.632	764.409
aten_s0029.g181	solute carrier family 22 member 5-like isoform X3	3449	992	601.632	764.409
aten_s0928.g1	zinc metalloproteinase nas-15-like isoform X2	1513	991	601.026	763.639
aten_s0010.g6	craniofacial development protein 2-like	1916	991	601.026	763.639
aten_s0392.g5		6236	990	600.419	762.868
aten_s0160.g28		1409	990	600.419	762.868
aten_s0017.g39	nephrocystin-4-like	4378	990	600.419	762.868
aten_s0210.g6	leucine-rich PPR motif-containing protein, mitochondrial-like	4930	988	599.206	761.327
aten_s0063.g52	nucleolar protein 16-like	2538	988	599.206	761.327
aten_s0035.g83	probable phospholipid-transporting ATPase IIA isoform X1	4899	988	599.206	761.327
aten_s0012.g132	transmembrane protein 242-like	2023	988	599.206	761.327
aten_s1376.g1	band 4.1-like protein 4 isoform X1	2204	986	597.993	759.786
aten_s0215.g5		13404	986	597.993	759.786
aten_s0034.g7	C-type lectin domain family 17, member A-like	3228	986	597.993	759.786
aten_s0433.g7		5921	986	597.993	759.786
aten_s0190.g21	28S ribosomal protein S31, mitochondrial-like	1963	986	597.993	759.786
aten_s0010.g29	protein DPCD-like isoform X2	1890	986	597.993	759.786
aten_s0189.g25	CUB and sushi domain-containing protein 1-like isoform X5	3958	985	597.387	759.015
aten_s0168.g2		5670	984	596.78	758.245
aten_s0372.g3		4323	984	596.78	758.245
aten_s0256.g6	serine/threonine-protein kinase ksp1-like	3135	984	596.78	758.245
aten_s0128.g25	upstream stimulatory factor 1-like isoform X4	2803	984	596.78	758.245
aten_s0050.g58	nucleolar MIF4G domain-containing protein 1-like isoform X1	3022	983	596.174	757.474
aten_s0358.g8	zinc finger C4H2 domain-containing protein-like	1651	982	595.567	756.704
aten_s0009.g187	N-lysine methyltransferase setd6-like, partial	3679	982	595.567	756.704
aten_s0022.g3		7724	980	594.354	755.162
aten_s0362.g10		2885	980	594.354	755.162
aten_s0024.g93	guanine nucleotide-binding protein G(q) subunit alpha-like	1587	980	594.354	755.162
aten_s0006.g4	ataxin-7-like protein 1 isoform X1	5025	979	593.748	754.392
aten_s0052.g73	leucine-rich repeat serine/threonine-protein kinase 2-like isoform X2	7452	976	591.928	752.08
aten_s0051.g12	SURP and G-patch domain-containing protein 1-like	2028	974	590.715	750.539
aten_s0013.g17	Transmembrane protein 26.*Homo sapiens OX=9606 GN=TMEM26 PE=1 SV=1	3138	974	590.715	750.539
aten_s0019.g44	ribosome production factor 1-like	1556	974	590.715	750.539
aten_s0043.g72		2214	974	590.715	750.539
aten_s0078.g83		2042	974	590.715	750.539
aten_s0031.g125	alkaline ceramidase-like	1262	974	590.715	750.539
aten_s0046.g148	probable RNA-dependent RNA polymerase 1	1755	974	590.715	750.539
aten_s0016.g99	translocation protein SEC62-like	1788	973	590.109	749.768
aten_s0151.g25		5098	972	589.502	748.998
aten_s0106.g41	chromatin assembly factor 1 subunit A-like	3539	972	589.502	748.998
aten_s0083.g77		4100	972	589.502	748.998
aten_s0062.g95	putative D-cysteine desulfhydrase 1, mitochondrial	1356	972	589.502	748.998
aten_s0268.g5	cdc42-interacting protein 4 homolog	4561	970	588.289	747.457
aten_s0449.g11	zinc finger FYVE domain-containing protein 21-like	1189	970	588.289	747.457
aten_s0016.g77	CAP-Gly domain-containing linker protein 4-like	6381	969	587.683	746.686
aten_s0045.g6	centromere-associated protein E-like	12311	968	587.076	745.915
aten_s0308.g3	hemicentin-1-like isoform X1	5744	966	585.863	744.374
aten_s0022.g9	unconventional myosin-Va-like	7014	966	585.863	744.374
aten_s0269.g28	large proline-rich protein bag6-A-like isoform X1	4534	966	585.863	744.374
aten_s0011.g186	fibroblast growth factor receptor 2-like	5788	966	585.863	744.374
aten_s0164.g17		2507	964	584.65	742.833
aten_s0028.g20	alpha-1,6-mannosylglycoprotein 6-beta-N-acetylglucosaminyltransferase A-like isoform X1	4883	964	584.65	742.833
aten_s0011.g125	phosphoethanolamine N-methyltransferase 1-like	1964	964	584.65	742.833
aten_s0050.g52		2472	962	583.437	741.292
aten_s0011.g108	Tetratricopeptide repeat protein 31.*Homo sapiens OX=9606 GN=TTC31 PE=1 SV=3	2410	962	583.437	741.292
aten_s0136.g43		3962	961	582.831	740.521
aten_s0409.g8		4658	960	582.225	739.751
aten_s0076.g17	melanocyte-stimulating hormone receptor-like	1021	960	582.225	739.751
aten_s0084.g35	protein SCO1 homolog, mitochondrial-like	1216	960	582.225	739.751
aten_s0033.g45	LOW QUALITY PROTEIN: E3 ubiquitin-protein ligase RNF213-like	18449	960	582.225	739.751
aten_s0223.g2	retinol dehydrogenase 13-like	3484	959	581.618	738.98
aten_s0199.g13	LOW QUALITY PROTEIN: protein KIAA0100-like	7956	958	581.012	738.21
aten_s0202.g16	RNA-binding protein 26-like	3967	958	581.012	738.21
aten_s0005.g21		1020	958	581.012	738.21
aten_s0150.g31		3524	956	579.799	736.669
aten_s0021.g69	cyclin-dependent-like kinase 5	1137	956	579.799	736.669
aten_s0099.g74		3160	956	579.799	736.669
aten_s0009.g193	SET and MYND domain-containing protein 4-like isoform X1	2925	956	579.799	736.669
aten_s0155.g11	ribonucleoside-diphosphate reductase large subunit-like	4164	954	578.586	735.127
aten_s0237.g36	sodium-independent sulfate anion transporter-like	3741	954	578.586	735.127
aten_s0068.g60	activin receptor type-2B-like isoform X1	660	954	578.586	735.127
aten_s0164.g8	cofilin-like	728	952	577.373	733.586
aten_s0027.g83	thiamine transporter 1-like	2448	952	577.373	733.586
aten_s0019.g85		5817	952	577.373	733.586
aten_s0006.g96	protein brambleberry-like isoform X1	2297	952	577.373	733.586
aten_s0095.g28	daple-like protein	2588	950	576.16	732.045
aten_s0182.g4		2841	948	574.947	730.504
aten_s0033.g25	caspase-9-like	2219	948	574.947	730.504
aten_s0639.g1	LOW QUALITY PROTEIN: protein ANTAGONIST OF LIKE HETEROCHROMATIN PROTEIN 1-like	912	946	573.734	728.963
aten_s0073.g6		4886	946	573.734	728.963
aten_s0047.g18	E3 ubiquitin-protein ligase TRIM37-like isoform X2	3633	946	573.734	728.963
aten_s0159.g19		2809	946	573.734	728.963
aten_s0132.g32	dnaJ homolog subfamily C member 10-like	2662	946	573.734	728.963
aten_s0136.g3	protein cereblon-like isoform X2	2349	943	571.914	726.651
aten_s0545.g6	bone morphogenetic protein 1-like	3328	942	571.308	725.881
aten_s0163.g39	negative elongation factor B-like	3956	942	571.308	725.881
aten_s0184.g19		7334	941	570.701	725.11
aten_s1017.g1	protein NLRC3-like	3869	940	570.095	724.339
aten_s0248.g11		4869	940	570.095	724.339
aten_s0079.g85	trichohyalin-like	7325	940	570.095	724.339
aten_s0048.g81		5148	939	569.488	723.569
aten_s0106.g21	sterol 3-beta-glucosyltransferase-like	3450	938	568.882	722.798
aten_s0015.g15	stress-induced-phosphoprotein 1-like	2020	936	567.669	721.257
aten_s0020.g48	glypican-4-like isoform X2	5057	936	567.669	721.257
aten_s0023.g68	DNA endonuclease RBBP8.*Danio rerio OX=7955 GN=rbbp8 PE=2 SV=1	3338	936	567.669	721.257
aten_s0085.g72	integrator complex subunit 5-like	3509	936	567.669	721.257
aten_s0021.g102		8424	936	567.669	721.257
aten_s0012.g138		429	936	567.669	721.257
aten_s0115.g59	carcinoembryonic antigen-related cell adhesion molecule 6-like isoform X1	4147	933	565.849	718.945
aten_s0342.g11	putative IQ motif and ankyrin repeat domain-containing protein	3604	932	565.243	718.175
aten_s0142.g44	grainyhead-like protein 2 homolog	3856	932	565.243	718.175
aten_s0009.g159		1923	931	564.636	717.404
aten_s0237.g13	riboflavin-binding protein-like	2177	929	563.424	715.863
aten_s0392.g2		1941	928	562.817	715.093
aten_s0204.g20		3723	928	562.817	715.093
aten_s0227.g21	serrate RNA effector molecule homolog isoform X2	3226	928	562.817	715.093
aten_s0018.g70	MAPK/MAK/MRK overlapping kinase-like	2607	928	562.817	715.093
aten_s0053.g77	protein HID1-like	1780	928	562.817	715.093
aten_s0096.g104	sodium/glucose cotransporter 5-like	5444	928	562.817	715.093
aten_s0227.g3		2629	927	562.211	714.322
aten_s0143.g9	AP-2 complex subunit alpha-2-like	2703	926	561.604	713.551
aten_s0113.g21	vesicle-associated membrane protein-associated protein B-like	2695	926	561.604	713.551
aten_s0065.g42		2822	926	561.604	713.551
aten_s0793.g2	skin secretory protein xP2-like	4506	924	560.391	712.01
aten_s0420.g5	serine/threonine-protein kinase TBK1-like isoform X1	4590	924	560.391	712.01
aten_s0002.g23	ribosomal protein S6 kinase alpha-3-like isoform X1	4464	924	560.391	712.01
aten_s0028.g117	latent-transforming growth factor beta-binding protein 1-like isoform X2	1004	924	560.391	712.01
aten_s0228.g6		2105	922	559.178	710.469
aten_s0251.g20	store-operated calcium entry regulator STIMATE-like	3028	922	559.178	710.469
aten_s0119.g30	peptidyl-prolyl cis-trans isomerase G-like isoform X3	3516	922	559.178	710.469
aten_s0026.g45	cation channel sperm-associated protein 4-like	2083	922	559.178	710.469
aten_s0273.g1	histone demethylase UTY-like	6128	920	557.965	708.928
aten_s0409.g3		4557	920	557.965	708.928
aten_s0163.g26	choline transporter-like protein 2	4278	920	557.965	708.928
aten_s0024.g55	neuropeptide FF receptor 2-like	1390	920	557.965	708.928
aten_s0014.g112	voltage-dependent R-type calcium channel subunit alpha-1E-like isoform X4	7023	920	557.965	708.928
aten_s0029.g146	transcription elongation factor SPT5-like	3256	920	557.965	708.928
aten_s0153.g2	tetratricopeptide repeat protein 28-like	2974	918	556.752	707.387
aten_s0419.g5	histone-lysine N-methyltransferase SUV39H1-A-like	724	918	556.752	707.387
aten_s0027.g108	serine/threonine-protein kinase 26-like	3690	918	556.752	707.387
aten_s0237.g25	cell wall protein RBR3-like	2389	915	554.933	705.075
aten_s0011.g67	ornithine aminotransferase, mitochondrial-like isoform X1	3993	915	554.933	705.075
aten_s0042.g50		981	914	554.326	704.304
aten_s0096.g56		2927	914	554.326	704.304
aten_s0056.g69		783	914	554.326	704.304
aten_s0074.g45	LOW QUALITY PROTEIN: cytoplasmic dynein 1 heavy chain 1-like	14287	913	553.72	703.534
aten_s0009.g216		1974	913	553.72	703.534
aten_s0181.g34		2783	912	553.113	702.763
aten_s0127.g36	cyclin-dependent kinase 20-like isoform X1	3077	912	553.113	702.763
aten_s0121.g41	pinin-like	2413	912	553.113	702.763
aten_s0005.g82	transient receptor potential cation channel subfamily A member 1-like isoform X1	4558	911	552.507	701.993
aten_s0019.g8	vesicular inhibitory amino acid transporter-like	2389	910	551.9	701.222
aten_s0128.g20	ribosomal RNA processing protein 1 homolog A-like	3152	909	551.294	700.452
aten_s0076.g47	coadhesin	6261	909	551.294	700.452
aten_s0001.g275	enoyl-[acyl-carrier-protein] reductase, mitochondrial-like isoform X1	2911	909	551.294	700.452
aten_s0060.g36	endothelin-converting enzyme homolog	3402	908	550.687	699.681
aten_s0045.g52		388	908	550.687	699.681
aten_s0028.g44	UDP-glucuronosyltransferase 2B15-like	2420	906	549.474	698.14
aten_s0019.g50		4549	906	549.474	698.14
aten_s0100.g54	LOW QUALITY PROTEIN: ubiquitin-associated protein 1-like	2050	906	549.474	698.14
aten_s0059.g61	ATP-dependent RNA helicase HAS1-like	3332	906	549.474	698.14
aten_s0024.g49		2446	905	548.868	697.369
aten_s0053.g69	LOW QUALITY PROTEIN: polycystic kidney disease protein 1-like 2	7685	904	548.261	696.599
aten_s0065.g83	centrosomal protein of 290 kDa-like isoform X2	1347	903	547.655	695.828
aten_s0058.g50	survival of motor neuron-related-splicing factor 30-like	3279	901	546.442	694.287
aten_s0409.g6		2385	900	545.835	693.516
aten_s0090.g1	aspartyl/asparaginyl beta-hydroxylase-like	973	898	544.623	691.975
aten_s0084.g15		2129	898	544.623	691.975
aten_s0052.g43	RNA transcription, translation and transport factor protein-like	1246	898	544.623	691.975
aten_s0017.g122	nucleoporin NUP188 homolog isoform X2	7646	898	544.623	691.975
aten_s0316.g16	cytosolic Fe-S cluster assembly factor NUBP2-like isoform X1	2252	897	544.016	691.205
aten_s0008.g136	tripartite motif-containing protein 2-like, partial	3316	896	543.41	690.434
aten_s0055.g26	dynein heavy chain 7, axonemal-like	10351	894	542.197	688.893
aten_s0027.g44	sortilin-related receptor-like	9538	894	542.197	688.893
aten_s0137.g35	gamma-glutamyl peptidase 3-like	2041	893	541.59	688.122
aten_s0001.g45	E3 ubiquitin-protein ligase MIB1-like	3838	893	541.59	688.122
aten_s0135.g54	protein CASC1-like isoform X1	2736	892	540.984	687.352
aten_s0062.g119	sodium/hydrogen exchanger 7-like	3784	892	540.984	687.352
aten_s0002.g288	nucleotide-binding oligomerization domain-containing protein 1-like	5770	892	540.984	687.352
aten_s0089.g94	protein mono-ADP-ribosyltransferase PARP14-like	4979	891	540.377	686.581
aten_s0581.g1		10783	890	539.771	685.811
aten_s0050.g31	E3 ubiquitin-protein ligase TRIM71-like	7908	890	539.771	685.811
aten_s0015.g50	BRISC and BRCA1-A complex member 2-like	2566	890	539.771	685.811
aten_s0184.g6	dynein heavy chain 2, axonemal-like	13608	889	539.164	685.04
aten_s0044.g20	AT-rich interactive domain-containing protein 4A-like	5324	889	539.164	685.04
aten_s0001.g62		2363	889	539.164	685.04
aten_s0045.g68		1688	889	539.164	685.04
aten_s0314.g2		2111	888	538.558	684.27
aten_s0568.g6		1567	888	538.558	684.27
aten_s0005.g13	heterogeneous nuclear ribonucleoprotein U-like protein 1	3301	888	538.558	684.27
aten_s0150.g14	serine/threonine-protein phosphatase PP1-like isoform X1	1266	888	538.558	684.27
aten_s0052.g134		5713	888	538.558	684.27
aten_s0027.g23	protein C-ets-2-like	2332	887	537.951	683.499
aten_s0009.g188	glutamic acid-rich protein-like	2383	887	537.951	683.499
aten_s0074.g16	V-type proton ATPase 21 kDa proteolipid subunit-like	2726	884	536.132	681.187
aten_s0117.g35	titin-like	3621	884	536.132	681.187
aten_s0056.g42	centromere protein F-like	3507	884	536.132	681.187
aten_s0207.g42	LOW QUALITY PROTEIN: sperm flagellar protein 2-like	6183	884	536.132	681.187
aten_s0006.g46	probable ATP-dependent DNA helicase HFM1 isoform X4	5053	884	536.132	681.187
aten_s0033.g7	caspase-2-like	2316	882	534.919	679.646
aten_s0246.g7		8146	882	534.919	679.646
aten_s0096.g20		1734	882	534.919	679.646
aten_s0017.g42	ski oncogene-like	4448	882	534.919	679.646
aten_s0063.g71	ankyrin repeat domain-containing protein 50-like	5588	882	534.919	679.646
aten_s0491.g1	transient receptor potential cation channel subfamily M member 6-like	4273	880	533.706	678.105
aten_s0014.g146	serine/threonine-protein phosphatase 6 regulatory ankyrin repeat subunit A-like	3162	880	533.706	678.105
aten_s0029.g72	probable bifunctional dTTP/UTP pyrophosphatase/methyltransferase protein isoform X1	2692	879	533.099	677.334
aten_s0053.g47	protein sidekick-2-like	9546	878	532.493	676.564
aten_s0085.g95	endophilin-B2-like	1825	878	532.493	676.564
aten_s0234.g3	LOW QUALITY PROTEIN: EGF and laminin G domain-containing protein-like	3906	874	530.067	673.482
aten_s0015.g107	serine protease 23-like	3032	874	530.067	673.482
aten_s0052.g129	von Willebrand factor-like	6242	873	529.46	672.711
aten_s0108.g13		739	872	528.854	671.94
aten_s0136.g22	multidrug resistance protein 1-like	5499	872	528.854	671.94
aten_s0028.g34		7220	872	528.854	671.94
aten_s0010.g34	protein RRP5 homolog	8080	871	528.247	671.17
aten_s0003.g143	oocyte zinc finger protein XlCOF19-like	2152	871	528.247	671.17
aten_s0076.g11	Small lysine-rich protein 1.*Homo sapiens OX=9606 GN=SMKR1 PE=4 SV=1	1164	870	527.641	670.399
aten_s0016.g34	probable serine/threonine-protein kinase drkD isoform X2	3077	870	527.641	670.399
aten_s0062.g9	tumor necrosis factor receptor superfamily member 4-like	1528	869	527.034	669.629
aten_s0135.g7		2264	868	526.428	668.858
aten_s0151.g9	sulfite oxidase-like	2322	868	526.428	668.858
aten_s0265.g14	carbohydrate sulfotransferase 14-like	1161	868	526.428	668.858
aten_s0123.g40	NAD(P) transhydrogenase, mitochondrial-like	3875	868	526.428	668.858
aten_s0022.g65	tight junction protein ZO-1-like isoform X1	6379	868	526.428	668.858
aten_s0031.g39	golgin subfamily A member 4-like	558	866	525.215	667.317
aten_s0014.g44	protein BTN1-like	2897	866	525.215	667.317
aten_s0076.g69	ankyrin repeat domain-containing protein 16-like	2920	866	525.215	667.317
aten_s0049.g157	WD repeat and FYVE domain-containing protein 3-like	11837	866	525.215	667.317
aten_s0013.g174	dynein beta chain, ciliary-like	13970	866	525.215	667.317
aten_s0002.g216	mannosyl-oligosaccharide 1,2-alpha-mannosidase IA-like	3979	866	525.215	667.317
aten_s0145.g12	THAP domain-containing protein 1-like	3611	865	524.609	666.546
aten_s0286.g13		1228	865	524.609	666.546
aten_s0085.g90		6658	864	524.002	665.776
aten_s0001.g121	putative RNA-binding protein EEED8.10 isoform X4	3070	864	524.002	665.776
aten_s0044.g60	sacsin-like isoform X2	12843	863	523.396	665.005
aten_s0649.g3		2736	862	522.789	664.235
aten_s0210.g2	sodium-dependent phosphate transport protein 2B-like	2544	860	521.576	662.694
aten_s0206.g8	28S ribosomal protein S5, mitochondrial-like	1793	860	521.576	662.694
aten_s0009.g20	dynein beta chain, flagellar outer arm-like isoform X2	16515	860	521.576	662.694
aten_s0140.g22	exonuclease 3'-5' domain-containing protein 2-like	5809	860	521.576	662.694
aten_s0144.g24	low-density lipoprotein receptor-related protein 8-like	3918	860	521.576	662.694
aten_s0010.g165		2325	860	521.576	662.694
aten_s0055.g61	1-phosphatidylinositol 4,5-bisphosphate phosphodiesterase beta-1-like isoform X6	5096	859	520.97	661.923
aten_s0026.g49	GPI mannosyltransferase 2-like isoform X1	1829	858	520.363	661.152
aten_s0024.g122	peptidyl-prolyl cis-trans isomerase G-like isoform X1	4105	858	520.363	661.152
aten_s0354.g3	zinc finger protein 862-like	2033	856	519.15	659.611
aten_s0529.g7		1702	856	519.15	659.611
aten_s0068.g29	mitochondrial import receptor subunit TOM22 homolog	722	856	519.15	659.611
aten_s0017.g46	WD repeat-containing protein 70-like	2373	856	519.15	659.611
aten_s0197.g19	sacsin-like	13986	854	517.937	658.07
aten_s0167.g20		2673	854	517.937	658.07
aten_s0077.g27	neurogenic locus notch homolog protein 2-like	2932	854	517.937	658.07
aten_s0014.g2		11736	852	516.724	656.529
aten_s0054.g30	non-structural maintenance of chromosomes element 3 homolog	1643	852	516.724	656.529
aten_s0197.g36	DC-STAMP domain-containing protein 2-like	3761	852	516.724	656.529
aten_s0127.g52	cilia- and flagella-associated protein 100-like	2064	852	516.724	656.529
aten_s0021.g118	superoxide dismutase	1573	852	516.724	656.529
aten_s0038.g119	LOW QUALITY PROTEIN: cilia- and flagella-associated protein 46-like	9384	852	516.724	656.529
aten_s0053.g121	RNA-binding protein with serine-rich domain 1-like	1474	852	516.724	656.529
aten_s0045.g11		4163	850	515.511	654.988
aten_s0150.g8	casein kinase I-like	2508	848	514.298	653.447
aten_s0128.g35	multidrug resistance-associated protein 1-like	1911	848	514.298	653.447
aten_s0089.g39	glycine amidinotransferase, mitochondrial-like	2903	848	514.298	653.447
aten_s0354.g4		6162	847	513.692	652.676
aten_s0013.g21	ATP-binding cassette sub-family A member 5-like isoform X2	6394	846	513.085	651.905
aten_s0461.g3	protein BTN1-like	1670	844	511.872	650.364
aten_s0013.g18	BTB/POZ domain-containing protein KCTD5-like	2800	844	511.872	650.364
aten_s0225.g18	radial spoke head 10 homolog B-like	1501	842	510.659	648.823
aten_s0041.g42	chromodomain-helicase-DNA-binding protein 1-like isoform X1	6923	842	510.659	648.823
aten_s0163.g50	probable voltage-dependent R-type calcium channel subunit alpha-1E	5560	842	510.659	648.823
aten_s0541.g1	probable serine/threonine-protein kinase drkD isoform X2	853	840	509.446	647.282
aten_s0130.g44		4190	840	509.446	647.282
aten_s0098.g48		1339	840	509.446	647.282
aten_s0247.g8	cactin-like	2797	839	508.84	646.511
aten_s0223.g16	ankyrin repeat domain-containing protein 11-like	1006	839	508.84	646.511
aten_s0371.g9	formin-like	4288	838	508.233	645.741
aten_s0229.g13	zinc finger protein 862-like	5855	838	508.233	645.741
aten_s0029.g26		3456	838	508.233	645.741
aten_s0005.g27	U2 small nuclear ribonucleoprotein A'-like	2080	838	508.233	645.741
aten_s0004.g61	ras-related protein Rab-2	1726	838	508.233	645.741
aten_s0069.g81	Sel1-repeat-containing protein YbeT.*Escherichia coli (strain K12) OX=83333 GN=ybeT PE=2 SV=1	1375	838	508.233	645.741
aten_s0279.g23	UDP-N-acetylglucosamine--peptide N-acetylglucosaminyltransferase 110 kDa subunit-like isoform X1	2484	837	507.627	644.97
aten_s0060.g76	A disintegrin and metalloproteinase with thrombospondin motifs adt-1-like isoform X7	4485	837	507.627	644.97
aten_s0008.g83		968	837	507.627	644.97
aten_s0010.g175	nucleolar protein 14-like isoform X1	4116	837	507.627	644.97
aten_s0007.g26	receptor-type tyrosine-protein phosphatase F-like isoform X3	3414	836	507.021	644.2
aten_s0282.g1	serine/threonine-protein kinase BRSK2-like	2999	834	505.808	642.659
aten_s0079.g11	glutathione hydrolase 1 proenzyme-like	2514	834	505.808	642.659
aten_s0022.g17		3192	834	505.808	642.659
aten_s0003.g68	MORN repeat-containing protein 1-like	2482	834	505.808	642.659
aten_s0009.g160	glutamic acid-rich protein-like	4307	834	505.808	642.659
aten_s0049.g31	androgen-induced gene 1 protein-like	1438	833	505.201	641.888
aten_s0036.g111	glutathione reductase, mitochondrial-like	1950	832	504.595	641.117
aten_s0022.g6	leucine-rich melanocyte differentiation-associated protein-like	1575	830	503.382	639.576
aten_s0280.g23	POU domain, class 4, transcription factor 3-like isoform X1	3330	830	503.382	639.576
aten_s0003.g88	nucleolin 2-like isoform X2	2014	830	503.382	639.576
aten_s0301.g10	activin receptor type-1C-like	3075	828	502.169	638.035
aten_s0014.g19	lysM and putative peptidoglycan-binding domain-containing protein 4-like	1704	828	502.169	638.035
aten_s0143.g46	cytoskeleton-associated protein 5-like	7141	826	500.956	636.494
aten_s0076.g64		12068	826	500.956	636.494
aten_s0005.g95	transmembrane prolyl 4-hydroxylase-like isoform X1	1503	826	500.956	636.494
aten_s0107.g80		3431	825	500.349	635.723
aten_s0230.g12	septin-7-like isoform X1	3071	824	499.743	634.953
aten_s0023.g15	aquaporin-5-like	3109	824	499.743	634.953
aten_s0088.g30		2258	824	499.743	634.953
aten_s0098.g37		1711	824	499.743	634.953
aten_s0172.g44	catenin alpha-2-like	5542	824	499.743	634.953
aten_s0003.g184		850	824	499.743	634.953
aten_s0012.g194	heterogeneous nuclear ribonucleoprotein K-like	2605	824	499.743	634.953
aten_s0046.g110		2480	823	499.136	634.182
aten_s0597.g3		7310	822	498.53	633.412
aten_s0025.g4		4585	822	498.53	633.412
aten_s0028.g57		2503	822	498.53	633.412
aten_s0009.g24	RNA-binding protein 42-like	2483	820	497.317	631.871
aten_s0001.g156	myosin-9-like isoform X3	6879	820	497.317	631.871
aten_s0439.g3	ATP synthase subunit alpha, mitochondrial-like	3165	819	496.71	631.1
aten_s0069.g13	mRNA cap guanine-N7 methyltransferase-like	3439	819	496.71	631.1
aten_s0562.g3	importin subunit alpha-9-like isoform X2	2238	818	496.104	630.329
aten_s0178.g17		2583	818	496.104	630.329
aten_s0014.g21	protein casc4-like isoform X1	2510	818	496.104	630.329
aten_s0063.g47		5771	818	496.104	630.329
aten_s0044.g61	sacsin-like isoform X2	13662	818	496.104	630.329
aten_s0083.g81	nucleolar complex protein 3 homolog	2762	818	496.104	630.329
aten_s0053.g128	protein disulfide-isomerase 2-like isoform X1	1827	818	496.104	630.329
aten_s0230.g37	iroquois-class homeodomain protein irx-4-like isoform X1	2164	817	495.497	629.559
aten_s0014.g126	potassium voltage-gated channel subfamily A member 2-like	1812	816	494.891	628.788
aten_s0049.g177	rap guanine nucleotide exchange factor 4-like isoform X1	3447	816	494.891	628.788
aten_s0299.g10	dynein assembly factor 1, axonemal-like	3622	815	494.284	628.018
aten_s0531.g1	craniofacial development protein 2-like	1266	814	493.678	627.247
aten_s0275.g14		1778	814	493.678	627.247
aten_s0101.g41	guanine nucleotide-binding protein-like 3 homolog	2761	814	493.678	627.247
aten_s0059.g88	nucleoporin Nup43-like	2285	814	493.678	627.247
aten_s0269.g22	PHD finger protein 14-like isoform X2	1585	813	493.071	626.477
aten_s0195.g23	THAP domain-containing protein 10-like	484	813	493.071	626.477
aten_s0149.g10	LOW QUALITY PROTEIN: kelch-like protein 6	2363	812	492.465	625.706
aten_s0359.g16	inositol-tetrakisphosphate 1-kinase-like	3130	812	492.465	625.706
aten_s0049.g54	dolichyl-diphosphooligosaccharide--protein glycosyltransferase subunit STT3A	2348	812	492.465	625.706
aten_s0034.g99	eIF-2-alpha kinase activator GCN1-like	8292	812	492.465	625.706
aten_s0552.g5		3098	810	491.252	624.165
aten_s0292.g6		8081	810	491.252	624.165
aten_s0070.g7	cytosolic phospholipase A2-like isoform X1	4694	810	491.252	624.165
aten_s0151.g8	cuticle collagen 2C-like	1262	810	491.252	624.165
aten_s0123.g26	paired box protein Pax-6-like isoform X1	3874	810	491.252	624.165
aten_s0046.g103	eukaryotic translation initiation factor 2 subunit 1-like	1257	810	491.252	624.165
aten_s0120.g25	COMM domain-containing protein 10-like	3245	808	490.039	622.624
aten_s0299.g25	fibrous sheath-interacting protein 2-like	7508	808	490.039	622.624
aten_s0340.g25	NACHT, LRR and PYD domains-containing protein 9-like	3608	808	490.039	622.624
aten_s0177.g26		4555	808	490.039	622.624
aten_s0240.g30	major facilitator superfamily domain-containing protein 6-like	2200	808	490.039	622.624
aten_s0135.g51		5984	808	490.039	622.624
aten_s0056.g64	peregrin-like isoform X2	4663	808	490.039	622.624
aten_s0015.g193	photoreceptor-specific nuclear receptor-like isoform X2	2625	808	490.039	622.624
aten_s0053.g65	trichohyalin-like	6390	806	488.826	621.083
aten_s0065.g85	inositol monophosphatase 1-like	2522	806	488.826	621.083
aten_s0029.g182	organic cation transporter protein-like isoform X1	2402	806	488.826	621.083
aten_s0207.g15	transmembrane protein 69-like	2103	805	488.22	620.312
aten_s0005.g54	ubiquitin carboxyl-terminal hydrolase 24-like	9062	804	487.613	619.541
aten_s0067.g55	serine/threonine-protein kinase DCLK1-like	3540	804	487.613	619.541
aten_s0004.g57	LOW QUALITY PROTEIN: NFX1-type zinc finger-containing protein 1-like	8052	804	487.613	619.541
aten_s0043.g63		4102	803	487.007	618.771
aten_s0074.g9	protein KRI1 homolog	3945	802	486.4	618
aten_s0107.g14	N-acetylated-alpha-linked acidic dipeptidase 2-like	3490	802	486.4	618
aten_s0088.g35	proliferating cell nuclear antigen-like	2723	802	486.4	618
aten_s0091.g71	hepatocyte nuclear factor 1-beta-A-like isoform X1	4937	802	486.4	618
aten_s0058.g134		5420	802	486.4	618
aten_s0006.g60	lysine-specific demethylase 5C-like	6583	801	485.794	617.23
aten_s0067.g195	26S proteasome non-ATPase regulatory subunit 4-like	1952	801	485.794	617.23
aten_s0043.g123		3483	800	485.187	616.459
aten_s0049.g142	poly	5302	800	485.187	616.459
aten_s0119.g12		2505	798	483.974	614.918
aten_s0154.g29	nonsense-mediated mRNA decay protein 2-like	586	798	483.974	614.918
aten_s0069.g30	storkhead-box protein 2-like	3698	798	483.974	614.918
aten_s0092.g45	ruvB-like 2 isoform X3	2154	798	483.974	614.918
aten_s0063.g60		1622	798	483.974	614.918
aten_s0046.g89	LOW QUALITY PROTEIN: loricrin-like	1806	798	483.974	614.918
aten_s0084.g124	ADP-ribosylation factor 6-like	2699	798	483.974	614.918
aten_s0191.g3		1140	797	483.368	614.147
aten_s0044.g36	zinc transporter ZIP9-like	2831	797	483.368	614.147
aten_s0392.g3		1459	796	482.761	613.377
aten_s0039.g23	GRB10-interacting GYF protein 2-like	1302	796	482.761	613.377
aten_s0079.g120	hippocampus abundant transcript 1 protein-like	2277	796	482.761	613.377
aten_s0034.g156	major facilitator superfamily domain-containing protein 1-like isoform X4	1760	796	482.761	613.377
aten_s0162.g5	LIM/homeobox protein Awh-like isoform X1	2676	795	482.155	612.606
aten_s0040.g94	protein FAM102B-like isoform X2	3314	795	482.155	612.606
aten_s0067.g100	fibrocystin-L-like isoform X2	18250	795	482.155	612.606
aten_s0272.g6		2461	794	481.548	611.836
aten_s0006.g8	queuosine salvage protein-like	1480	794	481.548	611.836
aten_s0015.g194	cholesterol 24-hydroxylase-like	4680	794	481.548	611.836
aten_s0005.g218		6575	794	481.548	611.836
aten_s0108.g81	ribosomal protein S6 kinase alpha-5-like	4046	791	479.729	609.524
aten_s0510.g7		3007	790	479.122	608.753
aten_s0145.g9	hemicentin-2-like	2036	790	479.122	608.753
aten_s0104.g37	E3 ubiquitin-protein ligase MARCH9-like	1600	790	479.122	608.753
aten_s0081.g57		2891	790	479.122	608.753
aten_s0010.g66	myoferlin-like isoform X4	7721	790	479.122	608.753
aten_s0063.g74	DNA-directed RNA polymerases I and III subunit RPAC2-like	1558	790	479.122	608.753
aten_s0010.g186	ATP-binding cassette sub-family D member 2-like	3385	790	479.122	608.753
aten_s0023.g9		3847	788	477.909	607.212
aten_s0191.g19	tetratricopeptide repeat protein 28-like, partial	2171	788	477.909	607.212
aten_s0091.g47	glutamate receptor 4-like isoform X1	3187	788	477.909	607.212
aten_s0007.g138	T-complex protein 1 subunit epsilon-like	3653	788	477.909	607.212
aten_s0137.g42	prostatic acid phosphatase-like isoform X1	1781	786	476.696	605.671
aten_s0027.g51		6376	786	476.696	605.671
aten_s0111.g20	galanin receptor type 2-like	2182	785	476.09	604.9
aten_s0048.g28	deoxynucleoside triphosphate triphosphohydrolase SAMHD1-like	3307	785	476.09	604.9
aten_s0197.g51		2467	785	476.09	604.9
aten_s0013.g102	glutamic acid-rich protein-like isoform X1	3860	785	476.09	604.9
aten_s0231.g25	NACHT, LRR and PYD domains-containing protein 4C-like	7123	784	475.483	604.13
aten_s0061.g43	matrix metalloproteinase-19-like	1376	784	475.483	604.13
aten_s0003.g77	GMP synthase	2457	784	475.483	604.13
aten_s0033.g97	microtubule-associated protein futsch-like	6325	784	475.483	604.13
aten_s0005.g133	argininosuccinate lyase-like	1823	784	475.483	604.13
aten_s0001.g194	FK506-binding protein 5-like	4990	784	475.483	604.13
aten_s0160.g4	ATP-dependent RNA helicase DHX8-like	5140	782	474.27	602.589
aten_s0109.g15	kinase suppressor of Ras 1-like	3837	782	474.27	602.589
aten_s0068.g22		4071	782	474.27	602.589
aten_s0009.g27	cadherin EGF LAG seven-pass G-type receptor 2-like	2232	782	474.27	602.589
aten_s0068.g77	ankyrin repeat and sterile alpha motif domain-containing protein 1B-like isoform X1	6500	782	474.27	602.589
aten_s0011.g94		5663	782	474.27	602.589
aten_s0036.g110	ubiquitin-associated domain-containing protein 2-like isoform X1	2510	782	474.27	602.589
aten_s0005.g164	histone-lysine N-methyltransferase, H3 lysine-79 specific-like	1426	781	473.664	601.818
aten_s0021.g166	leucine-rich repeat and coiled-coil domain-containing protein 1-like	1833	781	473.664	601.818
aten_s0079.g17	histone-arginine methyltransferase CARMER-like isoform X1	3592	780	473.057	601.048
aten_s0013.g112		3696	780	473.057	601.048
aten_s0590.g1	tetratricopeptide repeat protein 28-like	3163	778	471.844	599.506
aten_s0178.g14	vacuolar protein sorting-associated protein 13D-like	14594	778	471.844	599.506
aten_s0035.g22	transmembrane prolyl 4-hydroxylase-like	1714	778	471.844	599.506
aten_s0055.g24	alsin-like	5882	778	471.844	599.506
aten_s0134.g36	FERM domain-containing protein 4A-like isoform X2	4911	778	471.844	599.506
aten_s0055.g48	sodium/potassium/calcium exchanger 4-like isoform X2	3470	778	471.844	599.506
aten_s0017.g80	prohibitin-2-like	1857	778	471.844	599.506
aten_s0040.g105	laminin subunit gamma-1-like	7800	778	471.844	599.506
aten_s0009.g108	NEDD8-activating enzyme E1 regulatory subunit-like	3128	778	471.844	599.506
aten_s0099.g32	zinc finger protein 853-like	732	777	471.238	598.736
aten_s0003.g58	amiloride-sensitive amine oxidase	1693	777	471.238	598.736
aten_s0044.g126	ADP-ribosylation factor-like protein 2	2224	776	470.631	597.965
aten_s1323.g1	cyclin-Q-like	1393	774	469.419	596.424
aten_s0244.g14	DEAD-box ATP-dependent RNA helicase 47, mitochondrial-like	1901	774	469.419	596.424
aten_s0185.g14	transmembrane prolyl 4-hydroxylase-like isoform X1	1856	774	469.419	596.424
aten_s0089.g16	CDC42 small effector protein 2-A-like isoform X1	1856	774	469.419	596.424
aten_s0115.g22		3984	774	469.419	596.424
aten_s0039.g50	transcription elongation regulator 1-like	4579	774	469.419	596.424
aten_s0104.g3		5179	772	468.206	594.883
aten_s0136.g16		4568	772	468.206	594.883
aten_s0255.g19	BTB/POZ domain-containing protein 7-like	3222	772	468.206	594.883
aten_s0228.g20	E3 ubiquitin-protein ligase rnf213-alpha-like	15297	772	468.206	594.883
aten_s0058.g43	transducin beta-like protein 3	3519	772	468.206	594.883
aten_s0015.g72	bone morphogenetic protein 2-A-like	2957	772	468.206	594.883
aten_s0019.g82	DNA ligase 1-like	1126	772	468.206	594.883
aten_s0004.g63	synaptic vesicle membrane protein VAT-1 homolog	2312	771	467.599	594.112
aten_s0381.g5	KH homology domain-containing protein 4-like isoform X1	3915	770	466.993	593.342
aten_s0115.g32	Transcription factor IIIA.*Rattus norvegicus OX=10116 GN=Gtf3a PE=2 SV=2	4262	770	466.993	593.342
aten_s0053.g50	myosin heavy chain, striated muscle-like isoform X2	6525	770	466.993	593.342
aten_s0013.g70		1796	770	466.993	593.342
aten_s0042.g97	transient receptor potential cation channel subfamily M member 3-like isoform X1	5269	770	466.993	593.342
aten_s0015.g106	kinesin-like protein KIF16B	5268	770	466.993	593.342
aten_s0067.g148	BCL2/adenovirus E1B 19 kDa protein-interacting protein 3-like isoform X2	2012	770	466.993	593.342
aten_s0006.g220	monoglyceride lipase-like isoform X1	1698	770	466.993	593.342
aten_s0001.g339	nucleoredoxin-like	3235	770	466.993	593.342
aten_s0182.g6	probable ATP-dependent RNA helicase DDX41 isoform X1	2977	769	466.386	592.571
aten_s0714.g1	Protein translocase subunit SecA.*Pelodictyon luteolum (strain DSM 273 / 2530) OX=319225 GN=secA PE=3 SV=1	8137	768	465.78	591.801
aten_s0058.g93	inactive ubiquitin carboxyl-terminal hydrolase 54-like	4842	768	465.78	591.801
aten_s0035.g98	adenine phosphoribosyltransferase-like	1920	768	465.78	591.801
aten_s0015.g151	chromatin-remodeling ATPase INO80-like	3979	768	465.78	591.801
aten_s0044.g34	zinc transporter ZIP9-like	1441	766	464.567	590.26
aten_s0004.g62	chromodomain-helicase-DNA-binding protein 8-like	8685	766	464.567	590.26
aten_s0068.g88		3986	765	463.96	589.489
aten_s0172.g20	50S ribosomal protein L35.*Syntrophobacter fumaroxidans (strain DSM 10017 / MPOB) OX=335543 GN=rpmI PE=3 SV=1	950	764	463.354	588.718
aten_s0021.g37	helix-loop-helix protein delilah-like	2560	764	463.354	588.718
aten_s0067.g131		3836	764	463.354	588.718
aten_s0003.g158	cleavage stimulation factor subunit 1-like isoform X2	1717	764	463.354	588.718
aten_s0024.g47		846	763	462.747	587.948
aten_s0005.g119	UDP-N-acetylglucosamine transferase subunit ALG14 homolog	1887	763	462.747	587.948
aten_s0002.g202	dnaJ homolog subfamily C member 8-like	935	763	462.747	587.948
aten_s0178.g6	ras-related protein Rab-39B-like	4026	762	462.141	587.177
aten_s0126.g19	GTP-binding protein 10.*Homo sapiens OX=9606 GN=GTPBP10 PE=1 SV=1	3228	762	462.141	587.177
[truncated: 21,123 more rows]
